# Supplementary material for: Synthesis, Molecular Docking, and Biofilm Formation Inhibitory Activity of Bis(Indolyl)Pyridines Analogues of the Marine Alkaloid Nortopsentin
Source: MDPI journal article supplement (doi:10.3390/molecules26144112), 2021-07-06

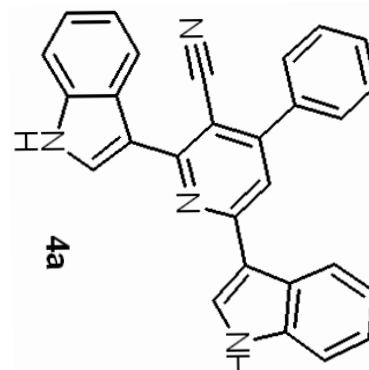

X : parts per Million : 1H

12.2829

8.4465  
8.2190  
8.0317  
8.0202  
8.0164  
7.5710  
7.5595  
7.5366  
7.2709  
7.2575  
7.2537

3.3465

2.4730  
2.4692  
2.4195

1.8823

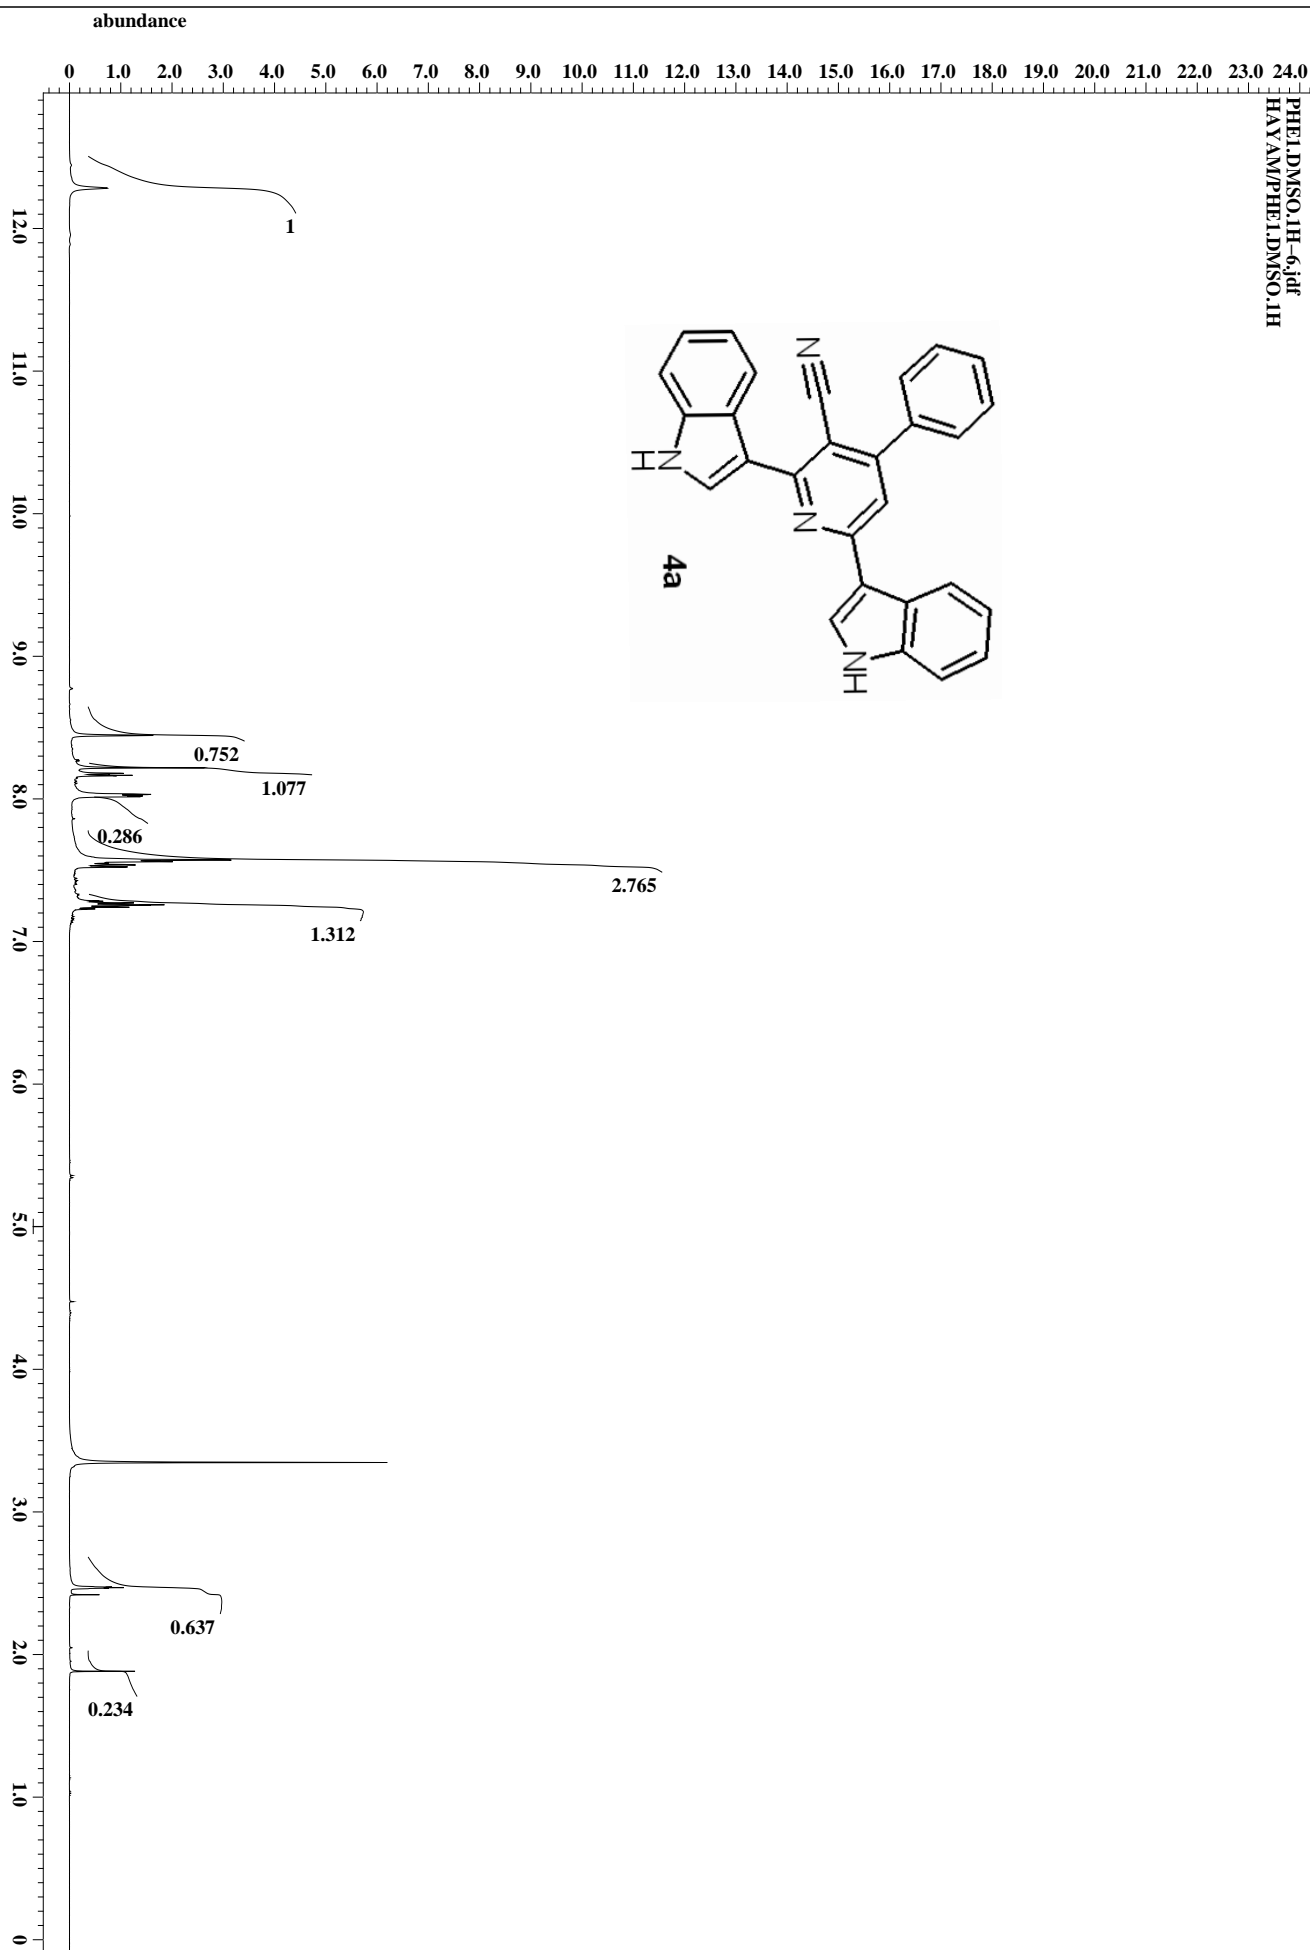

HAYAM-PHE1.DMSO.1H  
HAYAM-PHE1.DMSO.1H

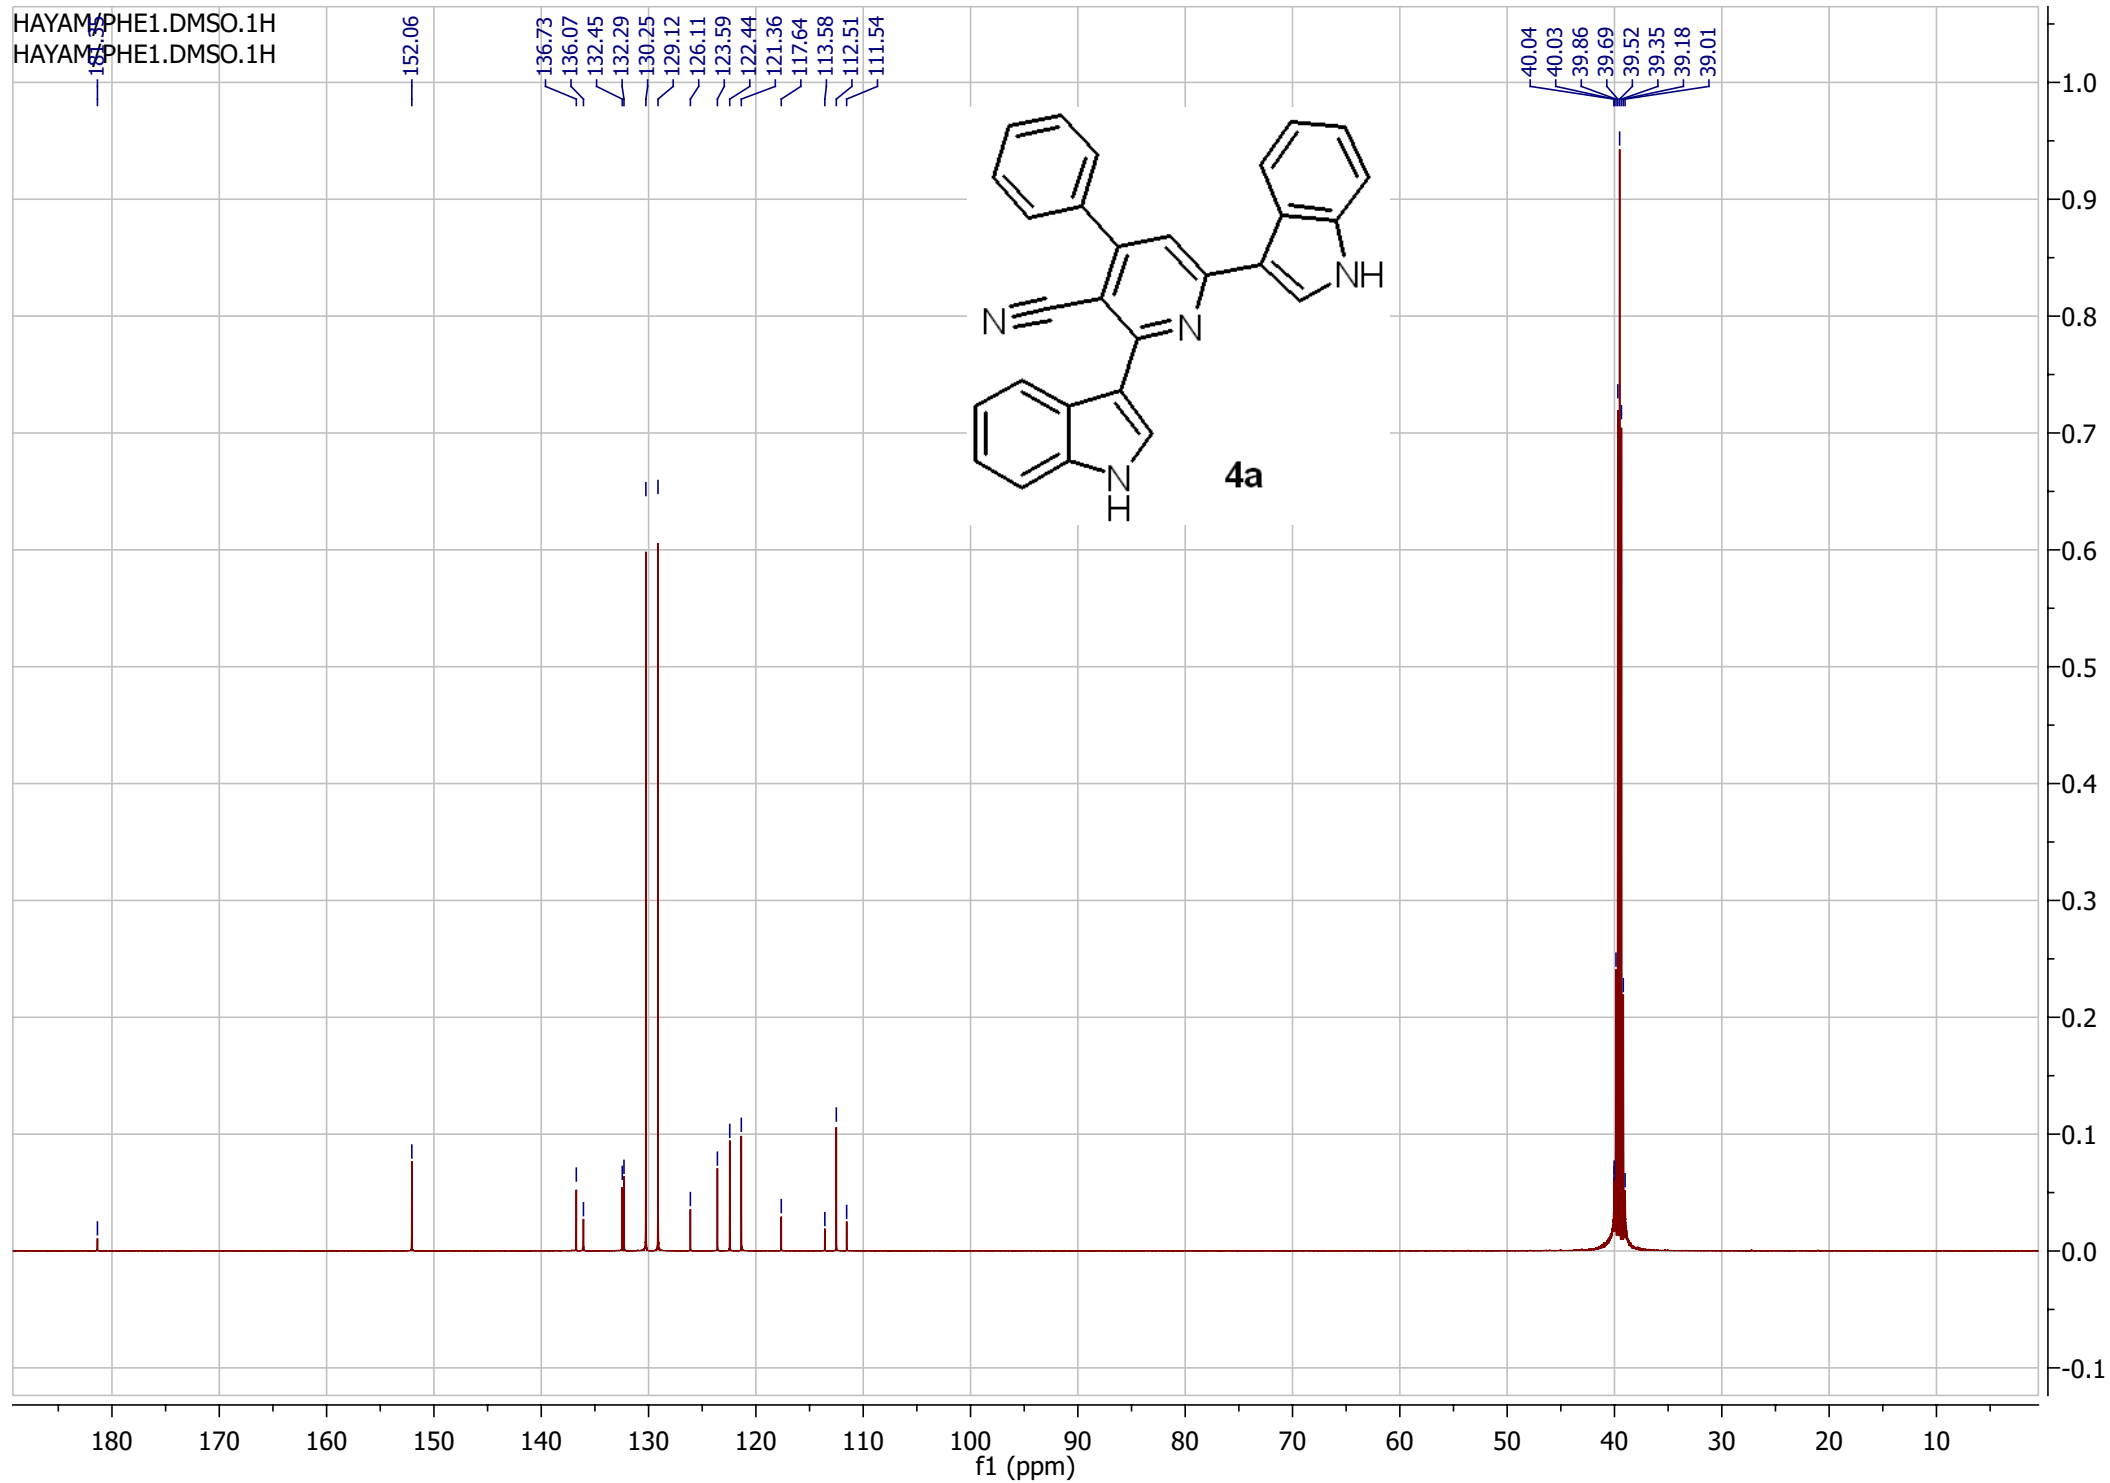

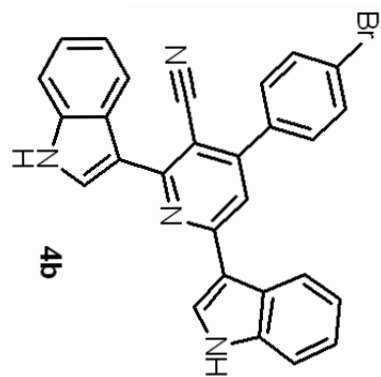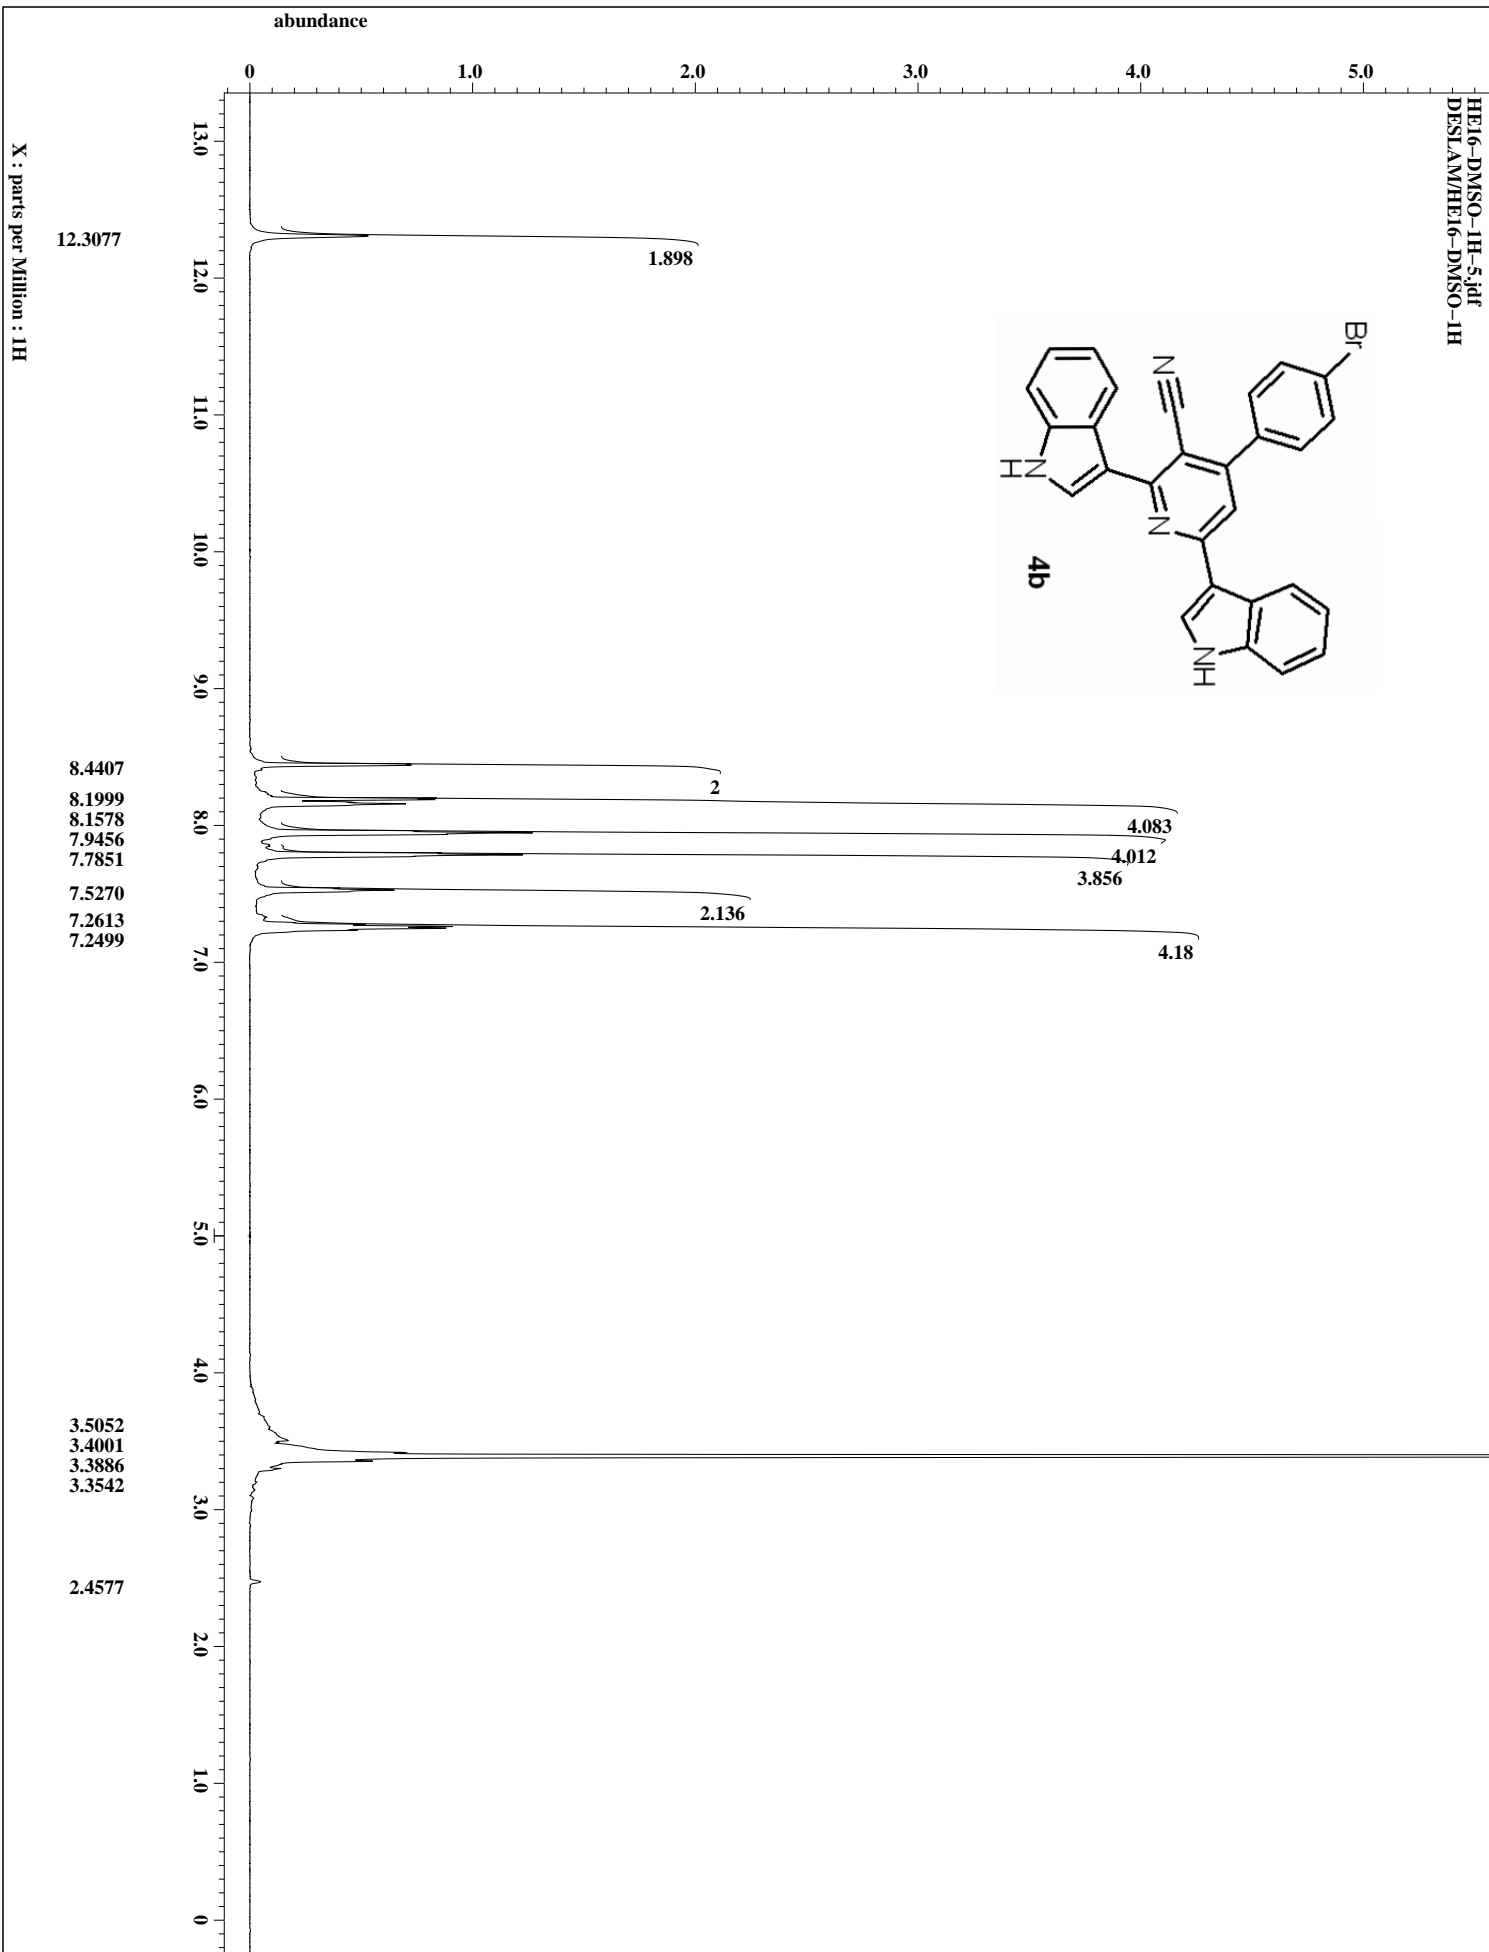

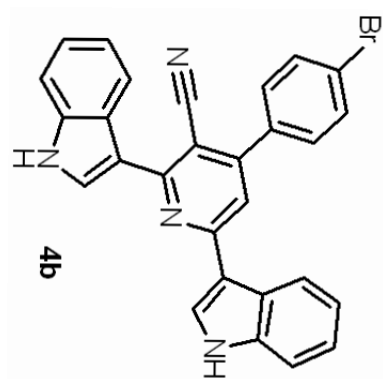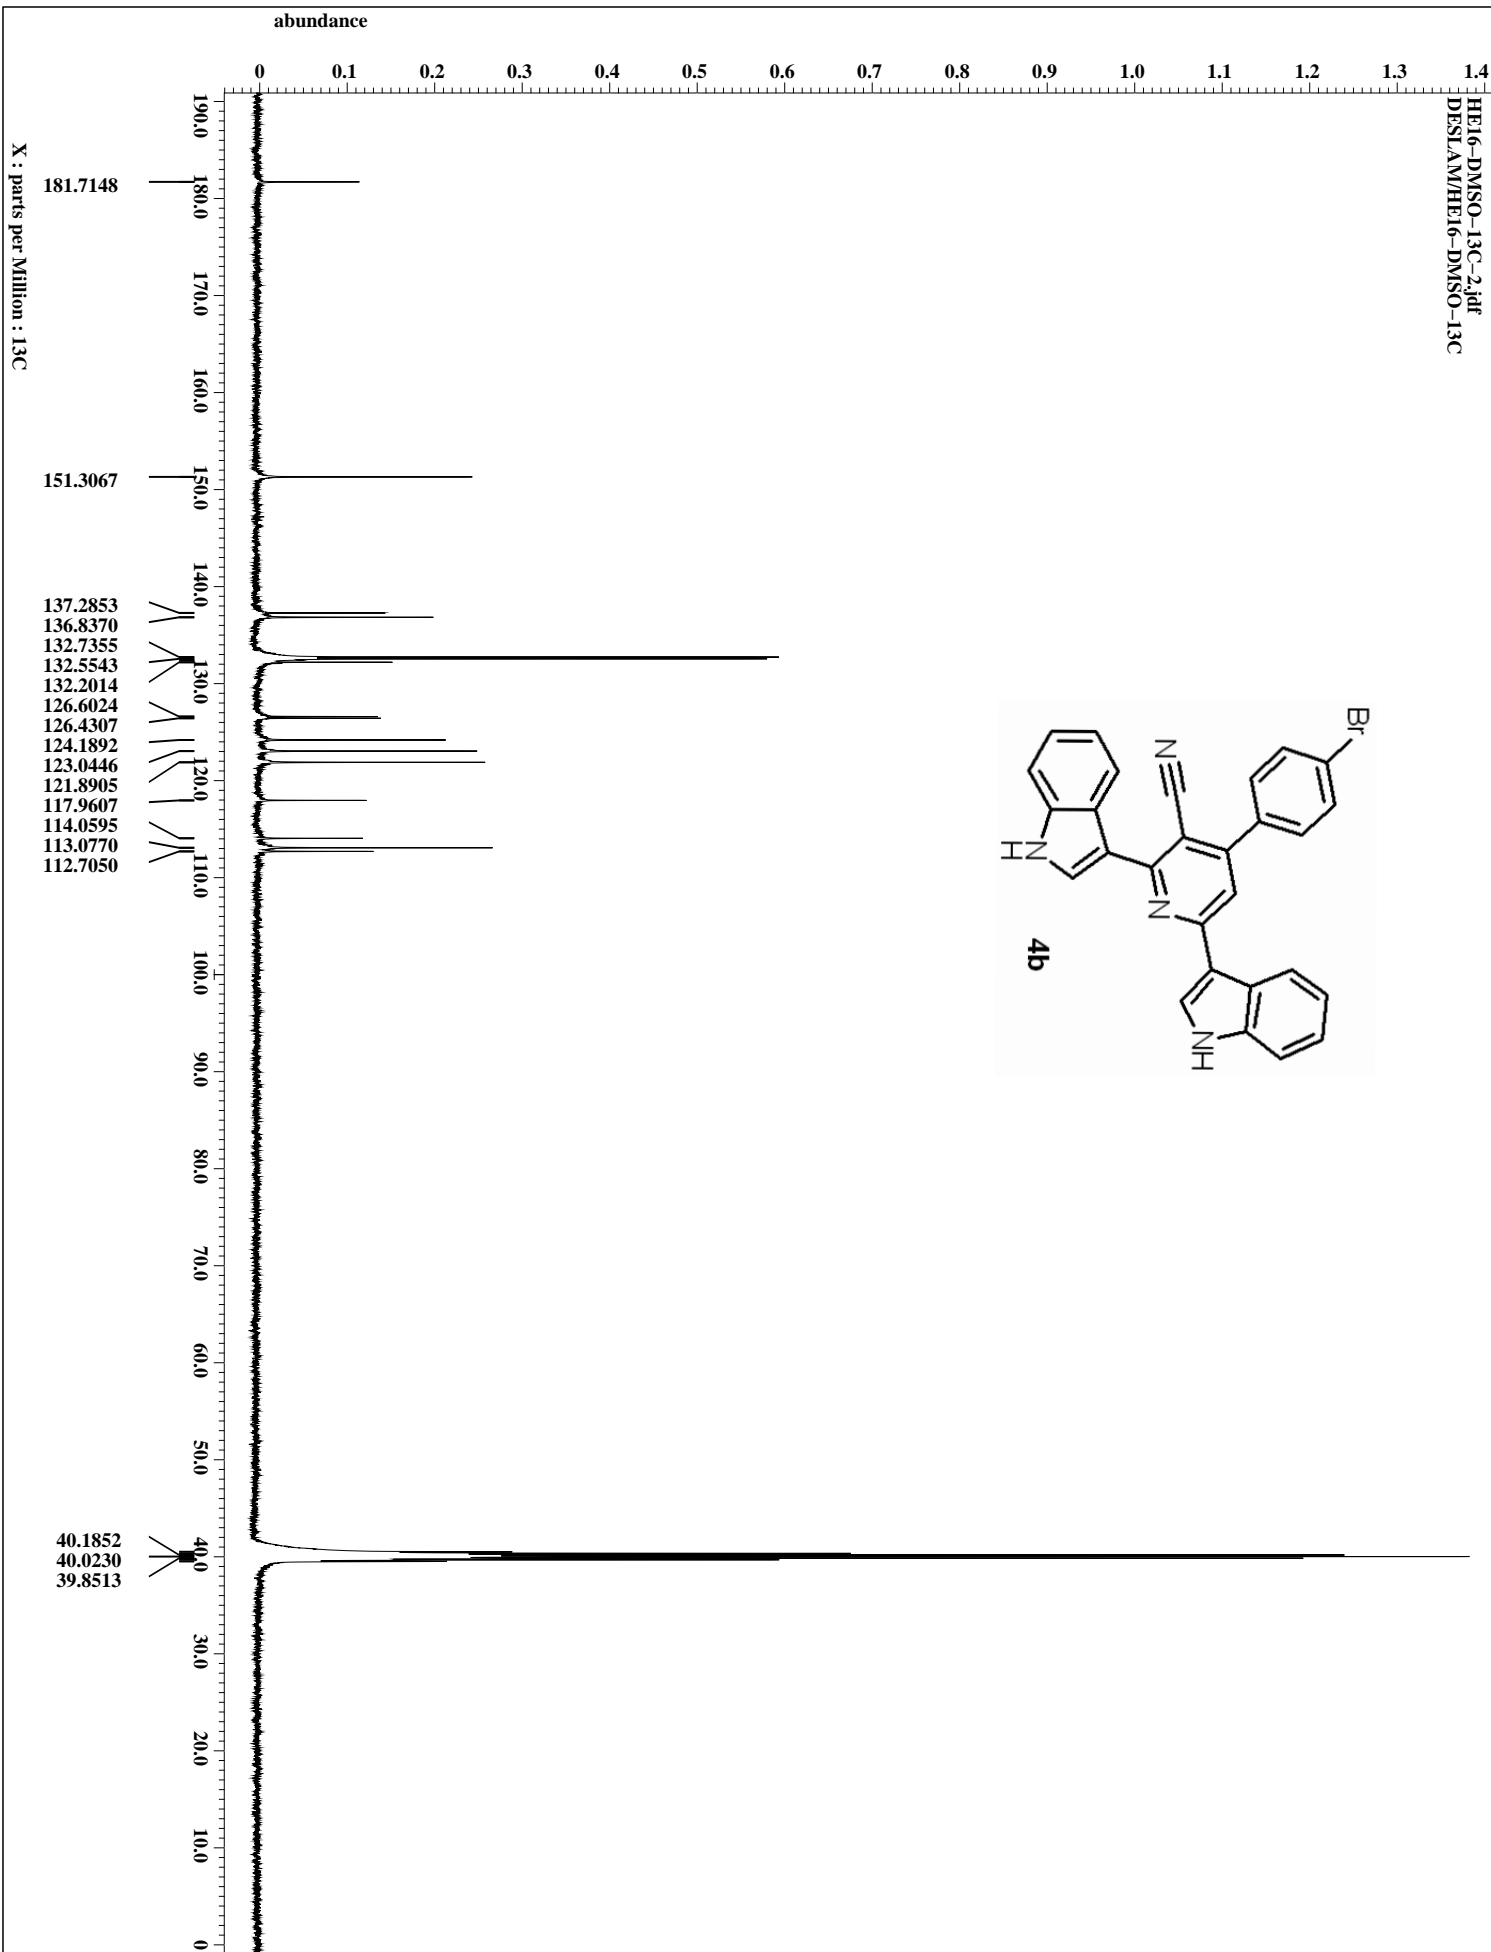

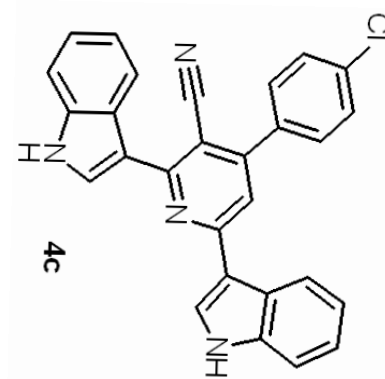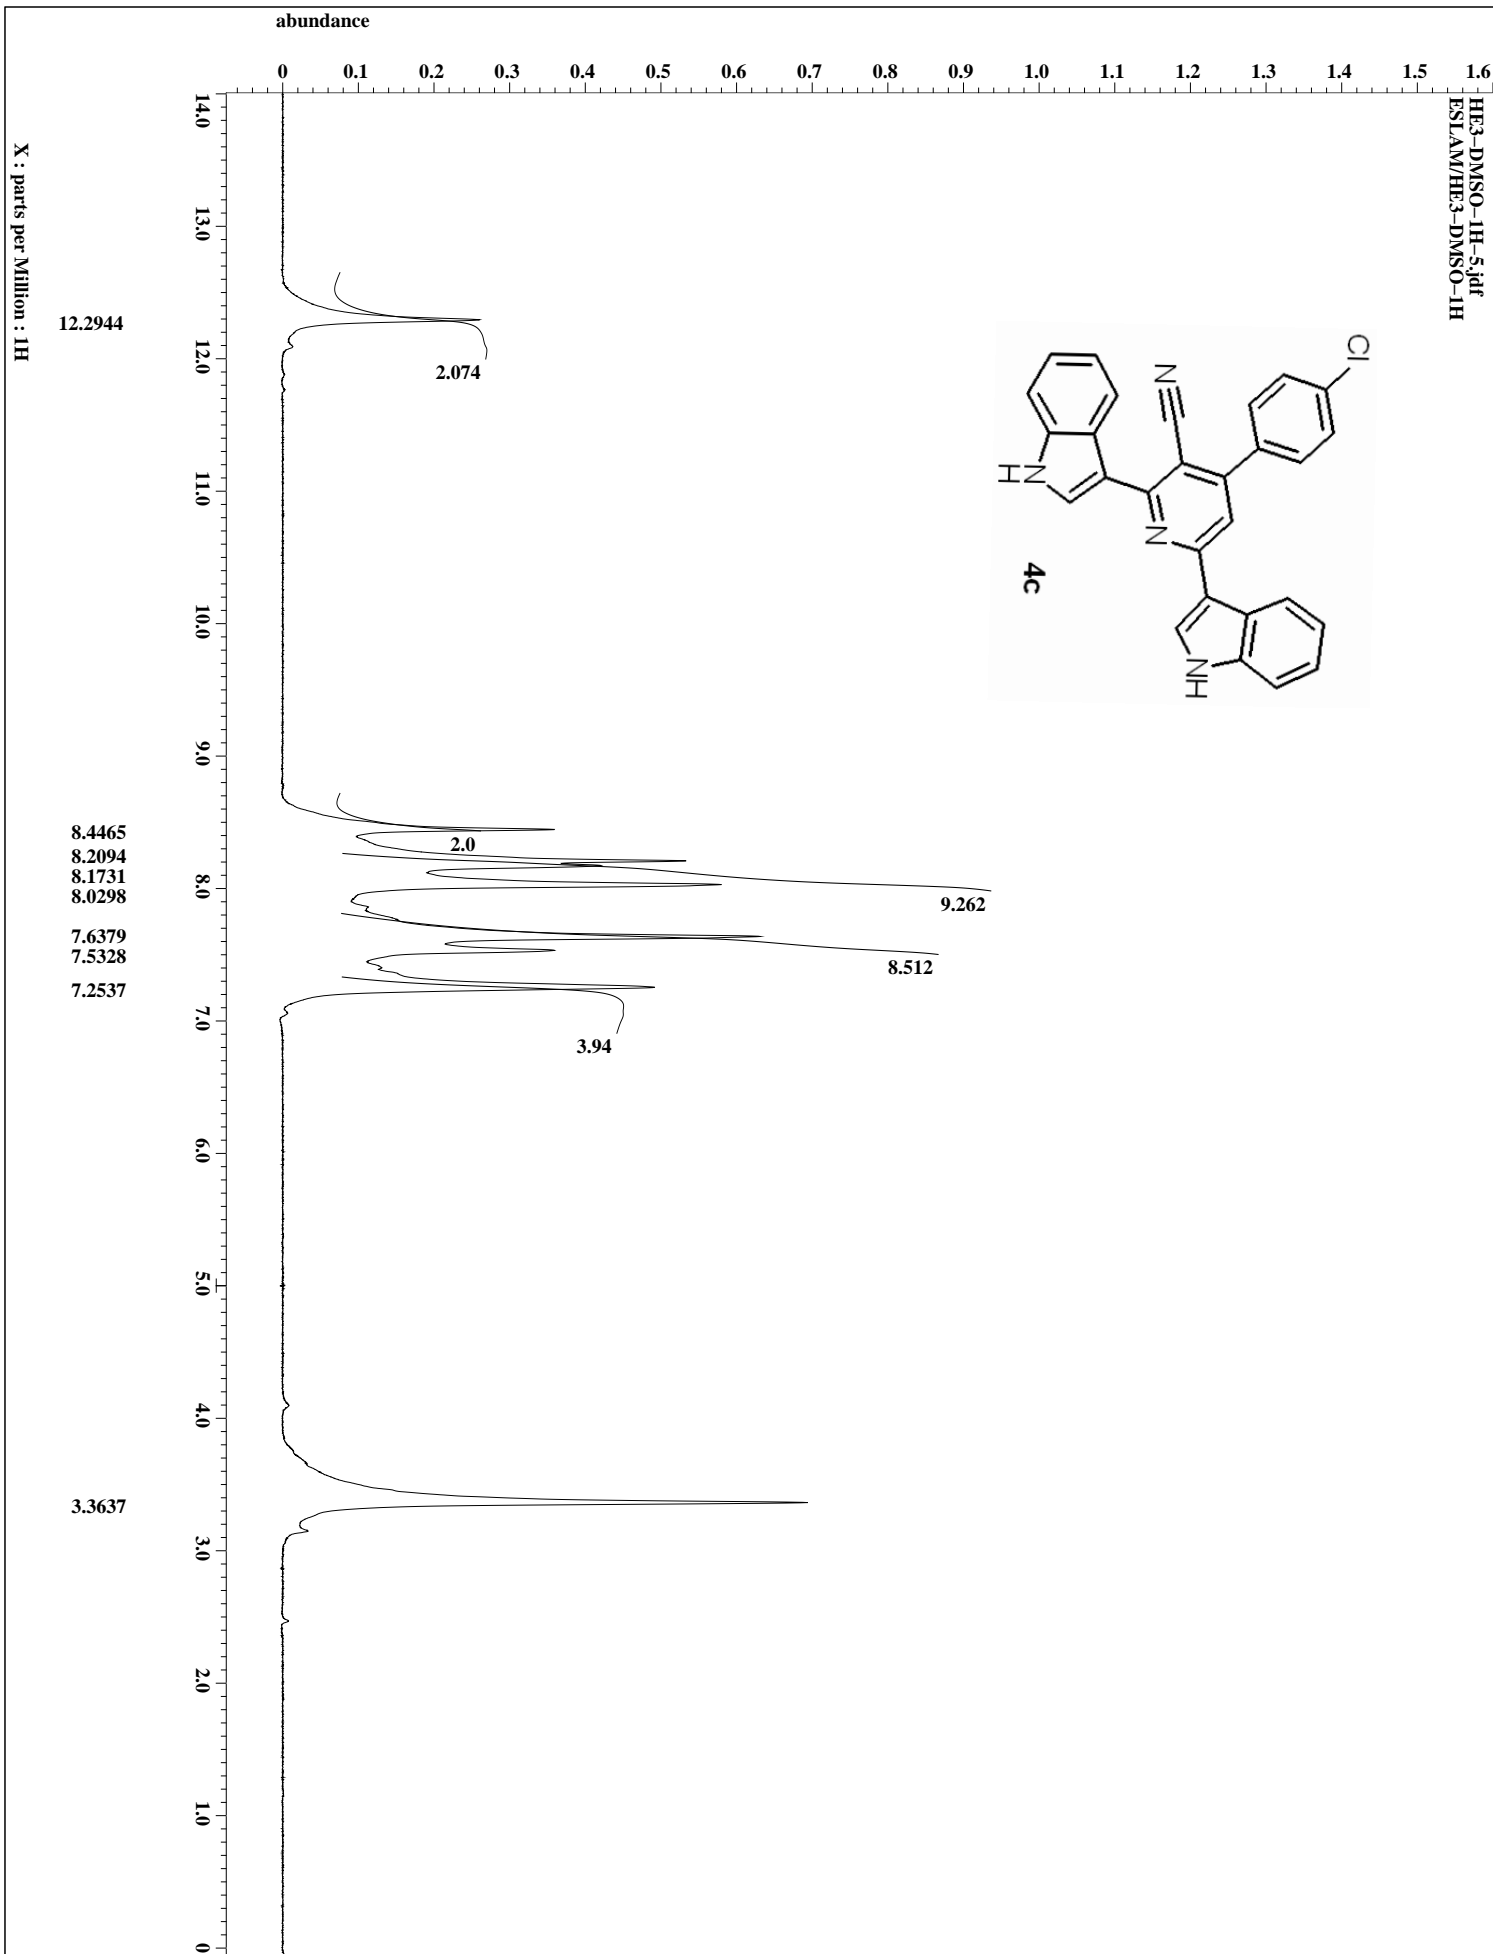

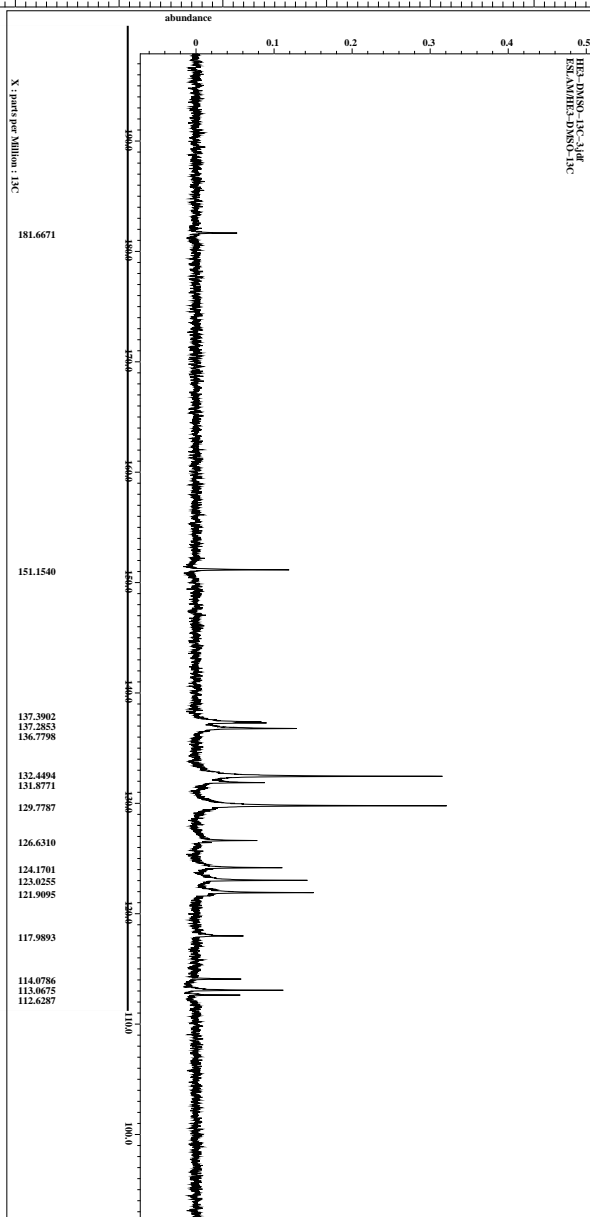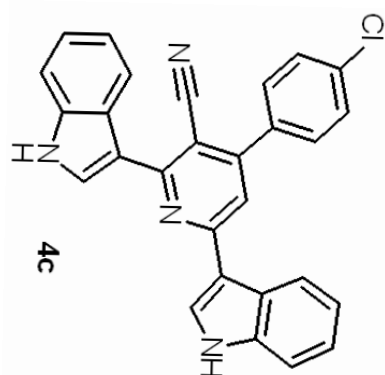

X : parts per Million : 13C

181.6671

151.1540

137.3902

137.2853

136.7798

132.4494

131.8771

129.7787

126.6310

124.1701

123.0255

121.9095

117.9893

114.0786

113.0675

112.6287

40.2233

40.0516

39.8895

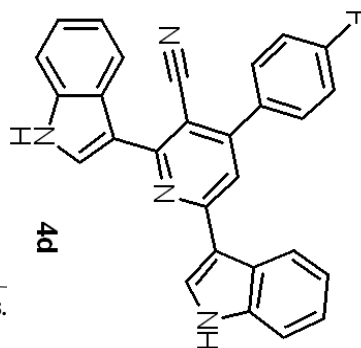

X : parts per Million : 1H

12.2963

1.86

8.4407  
8.2228  
8.1559  
8.1081

2

8

7.5232  
7.4219  
7.4047  
7.2518

1.705

3.686

4.309

3.5033  
3.4039

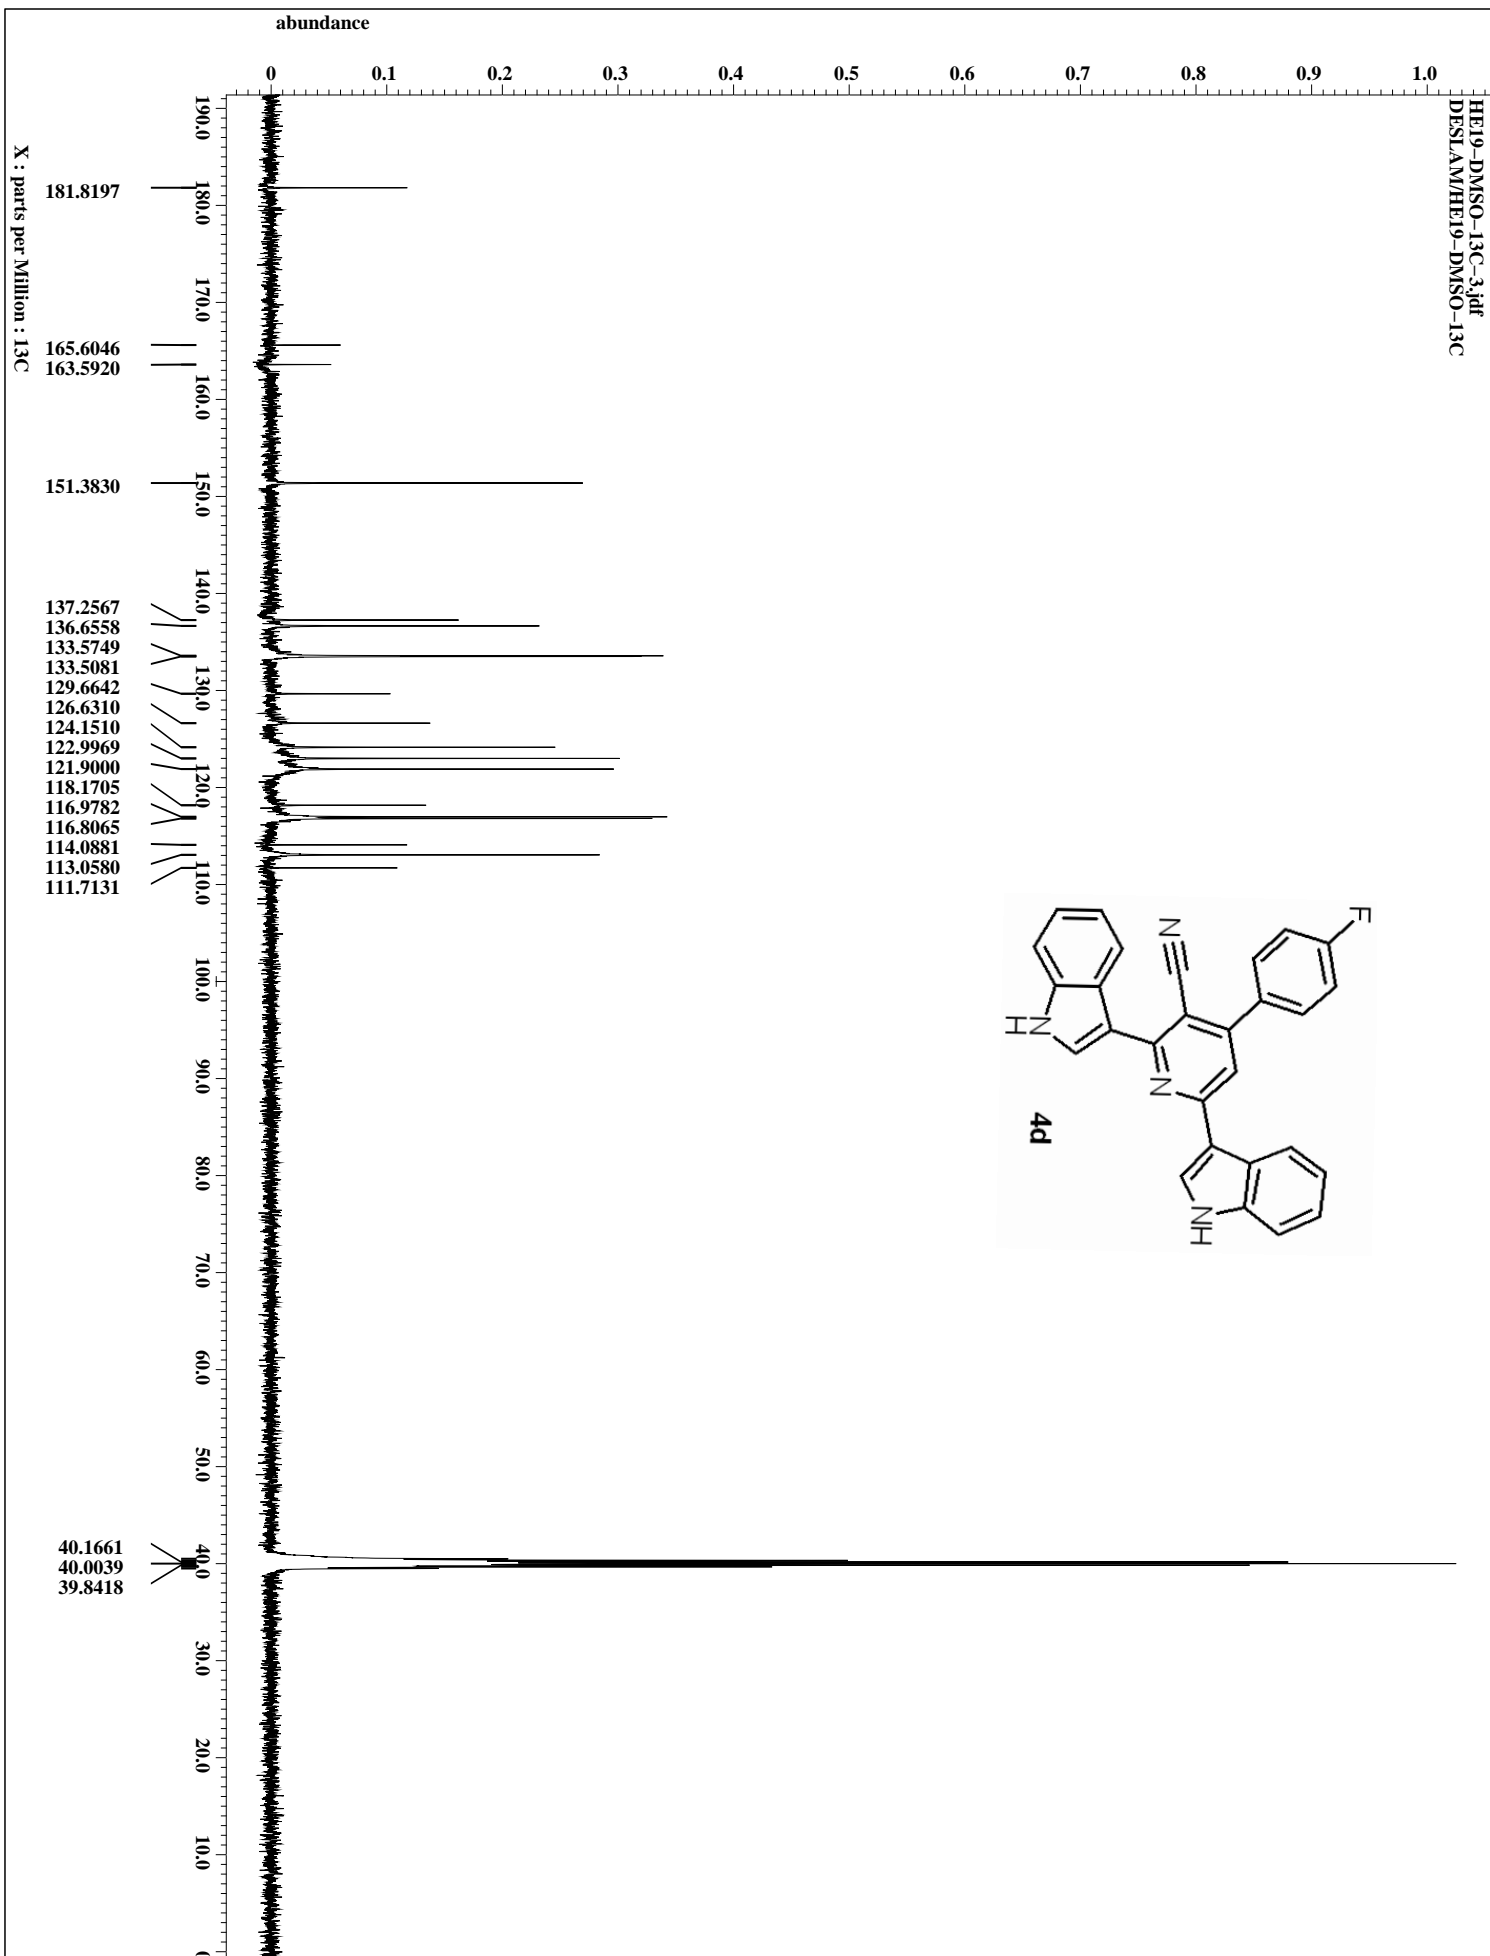



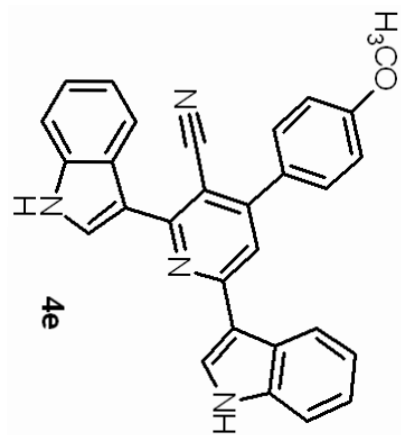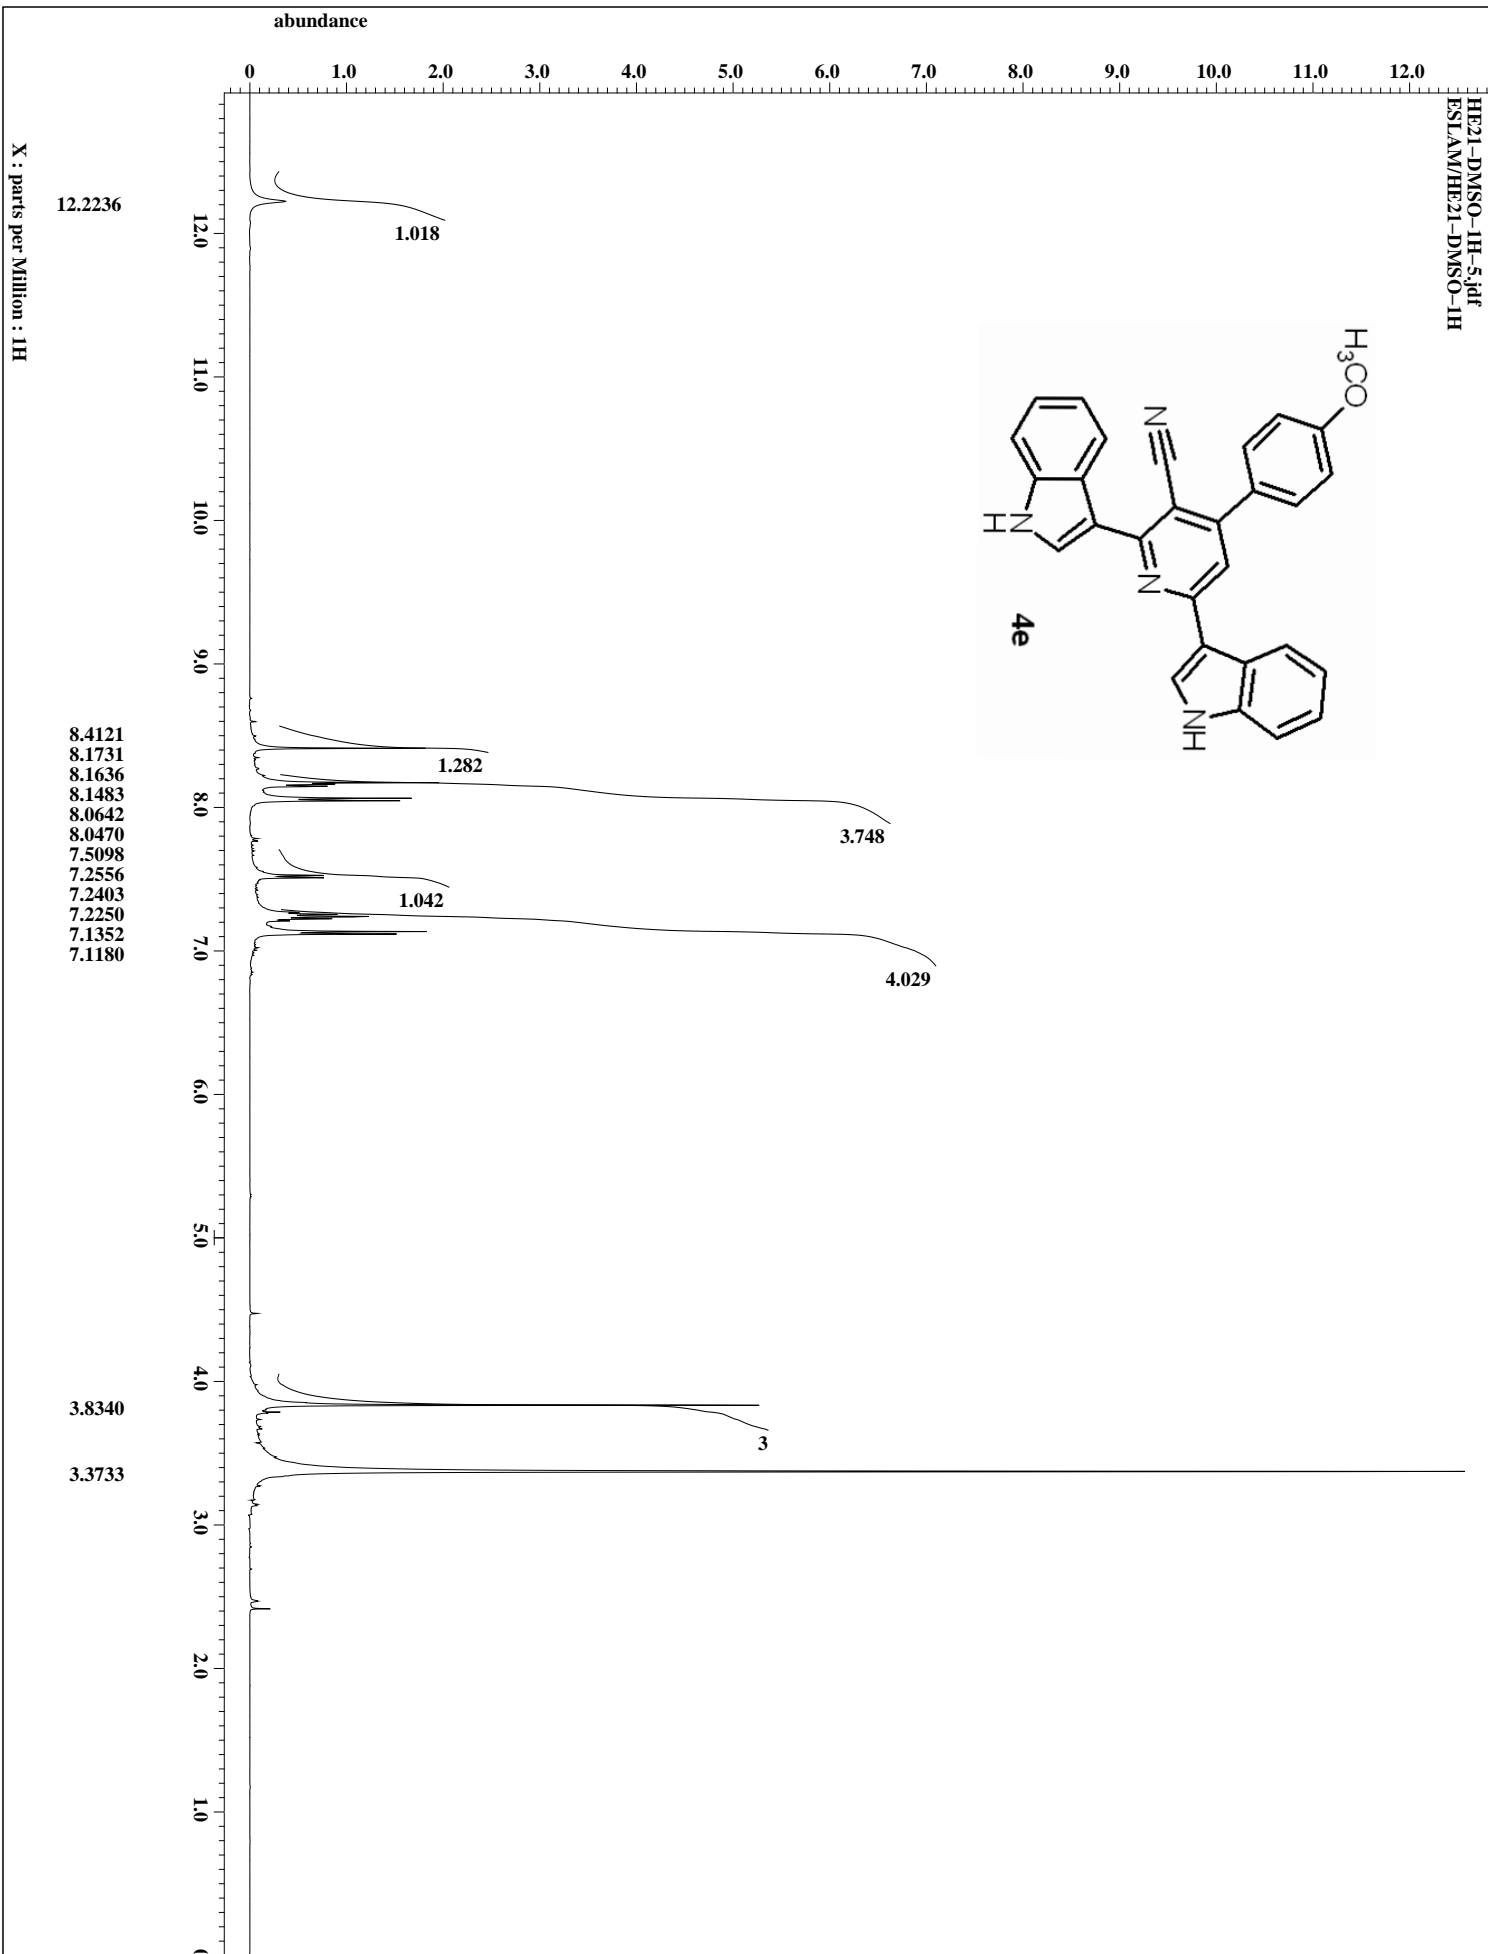

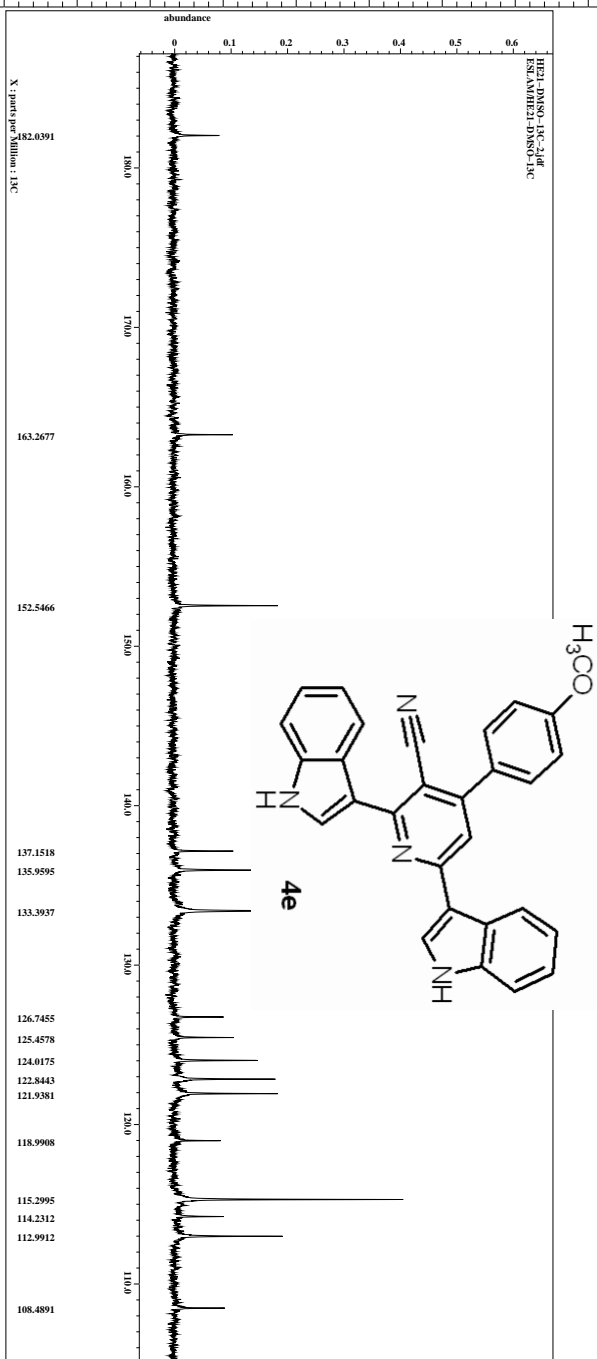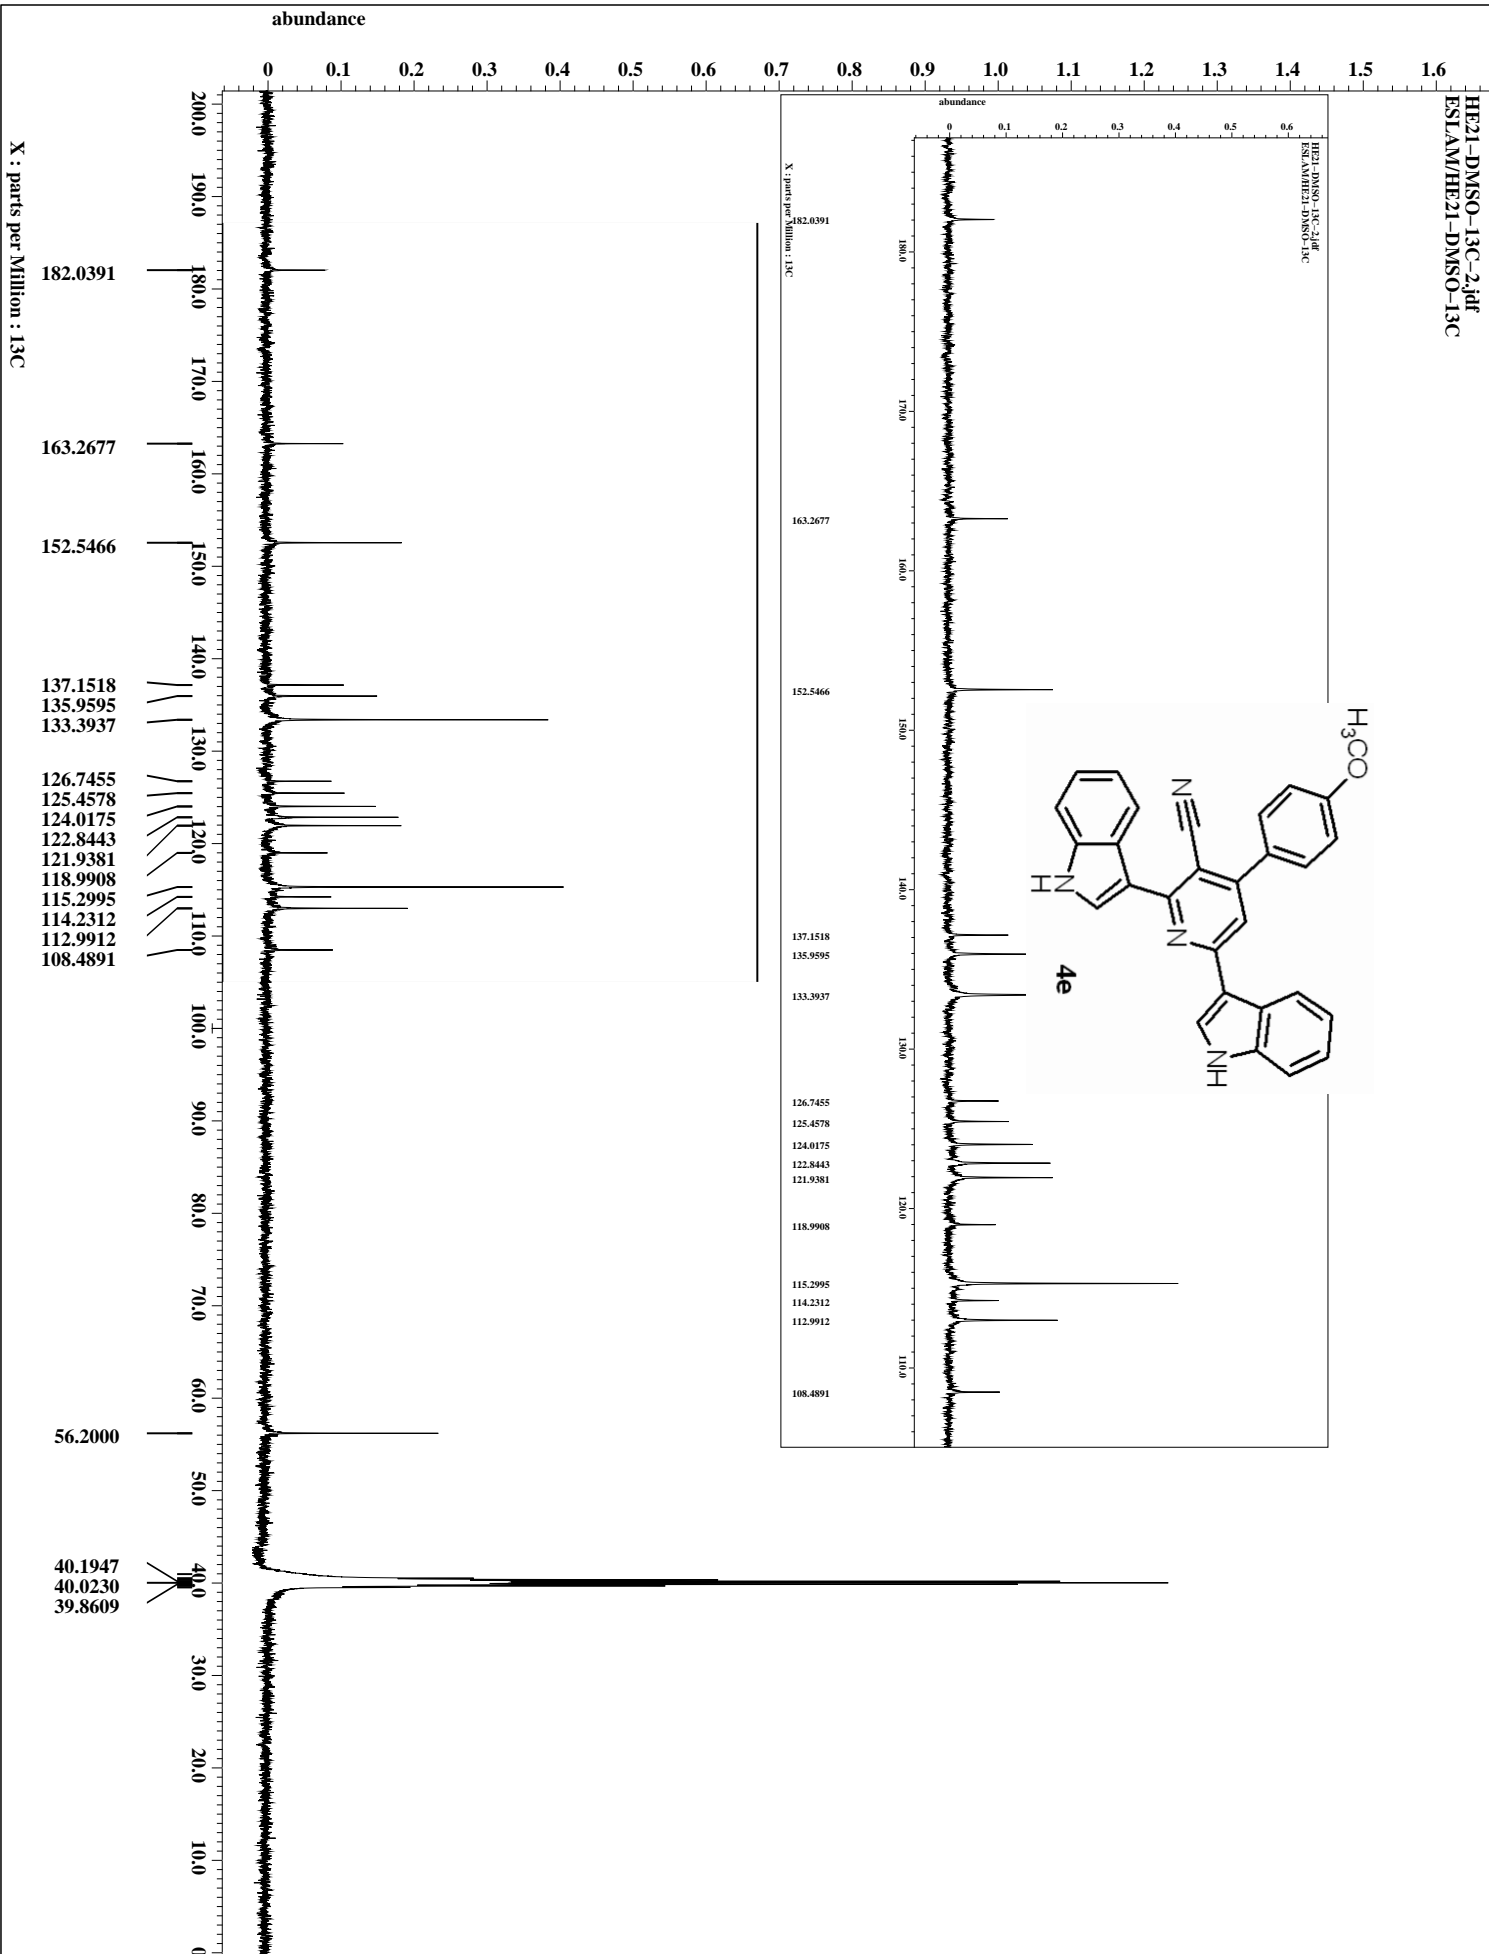

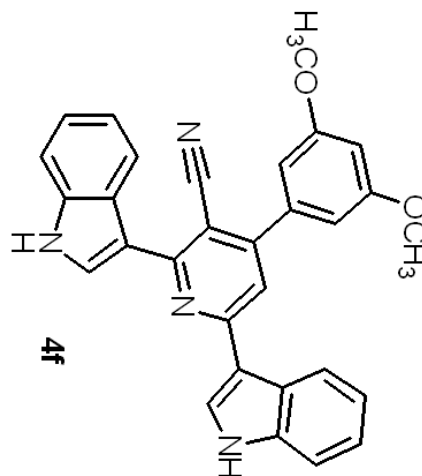

X : parts per Million : 1H

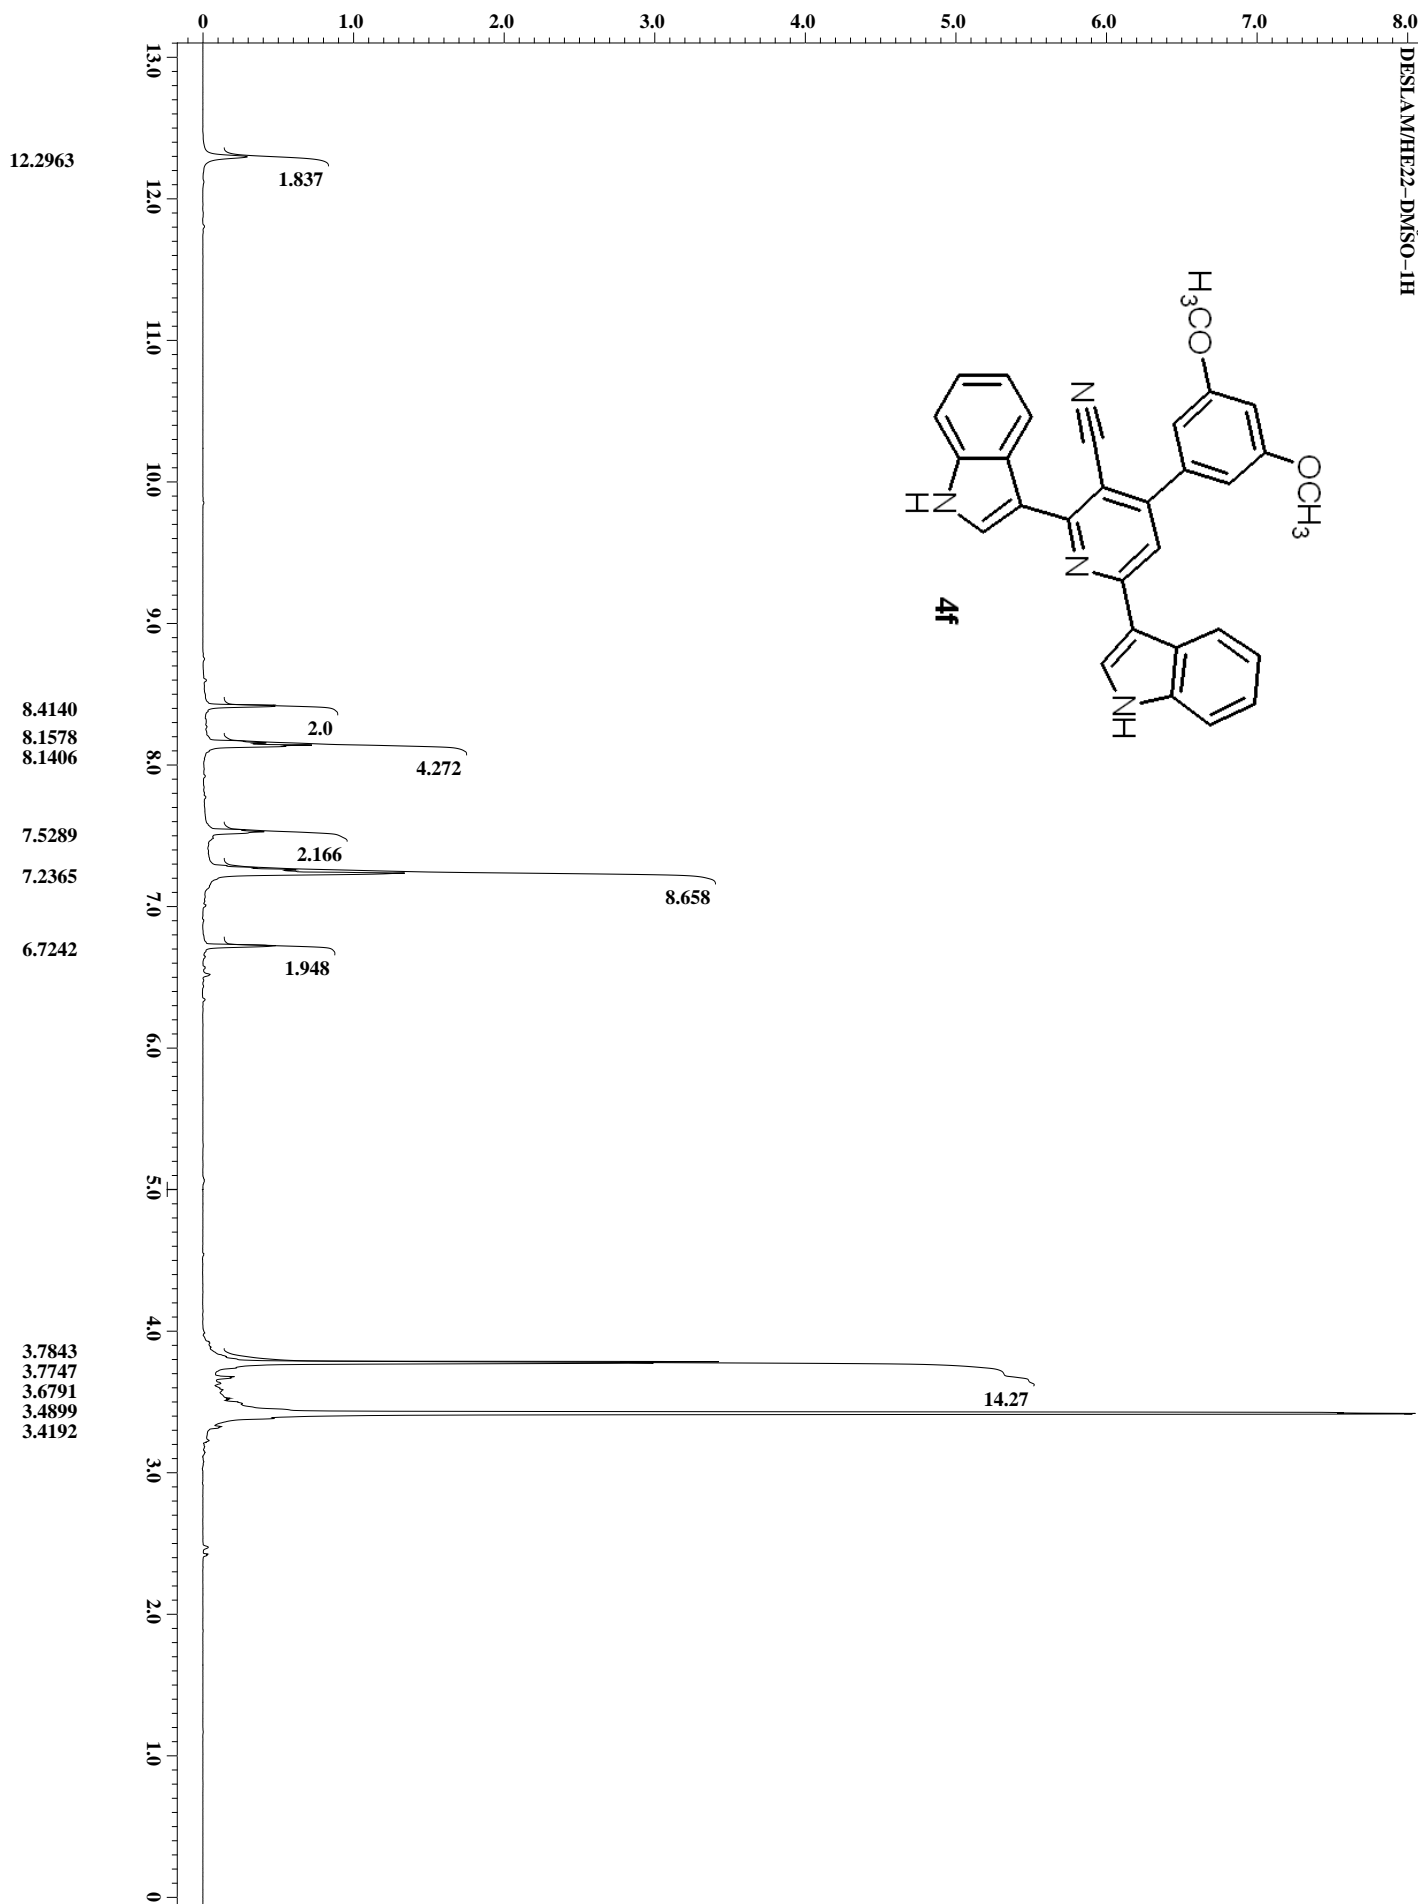

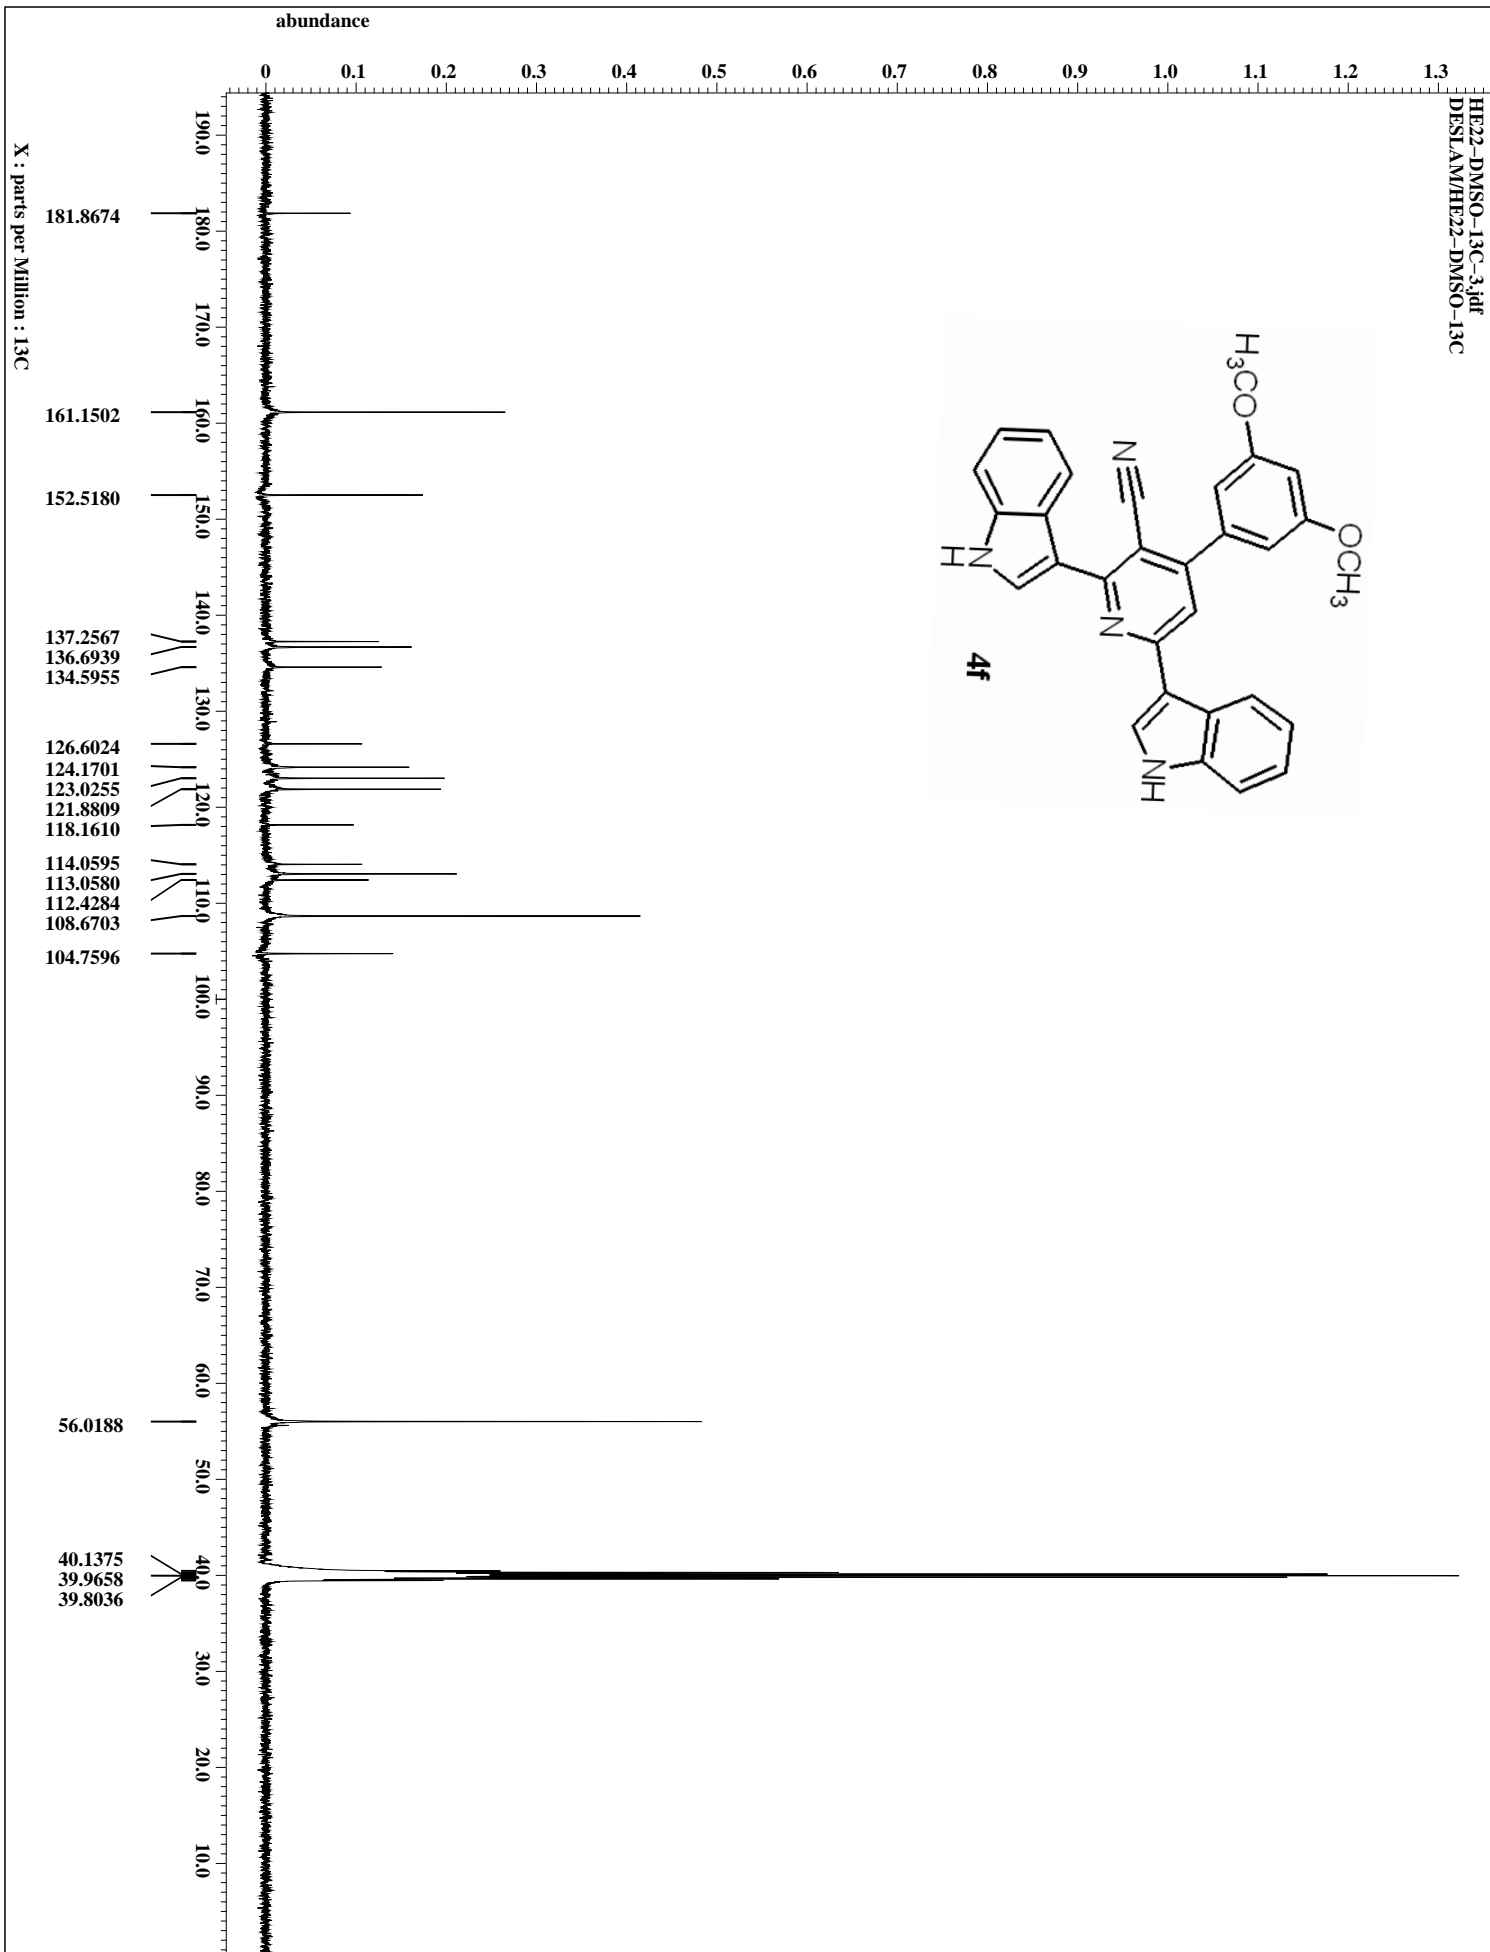

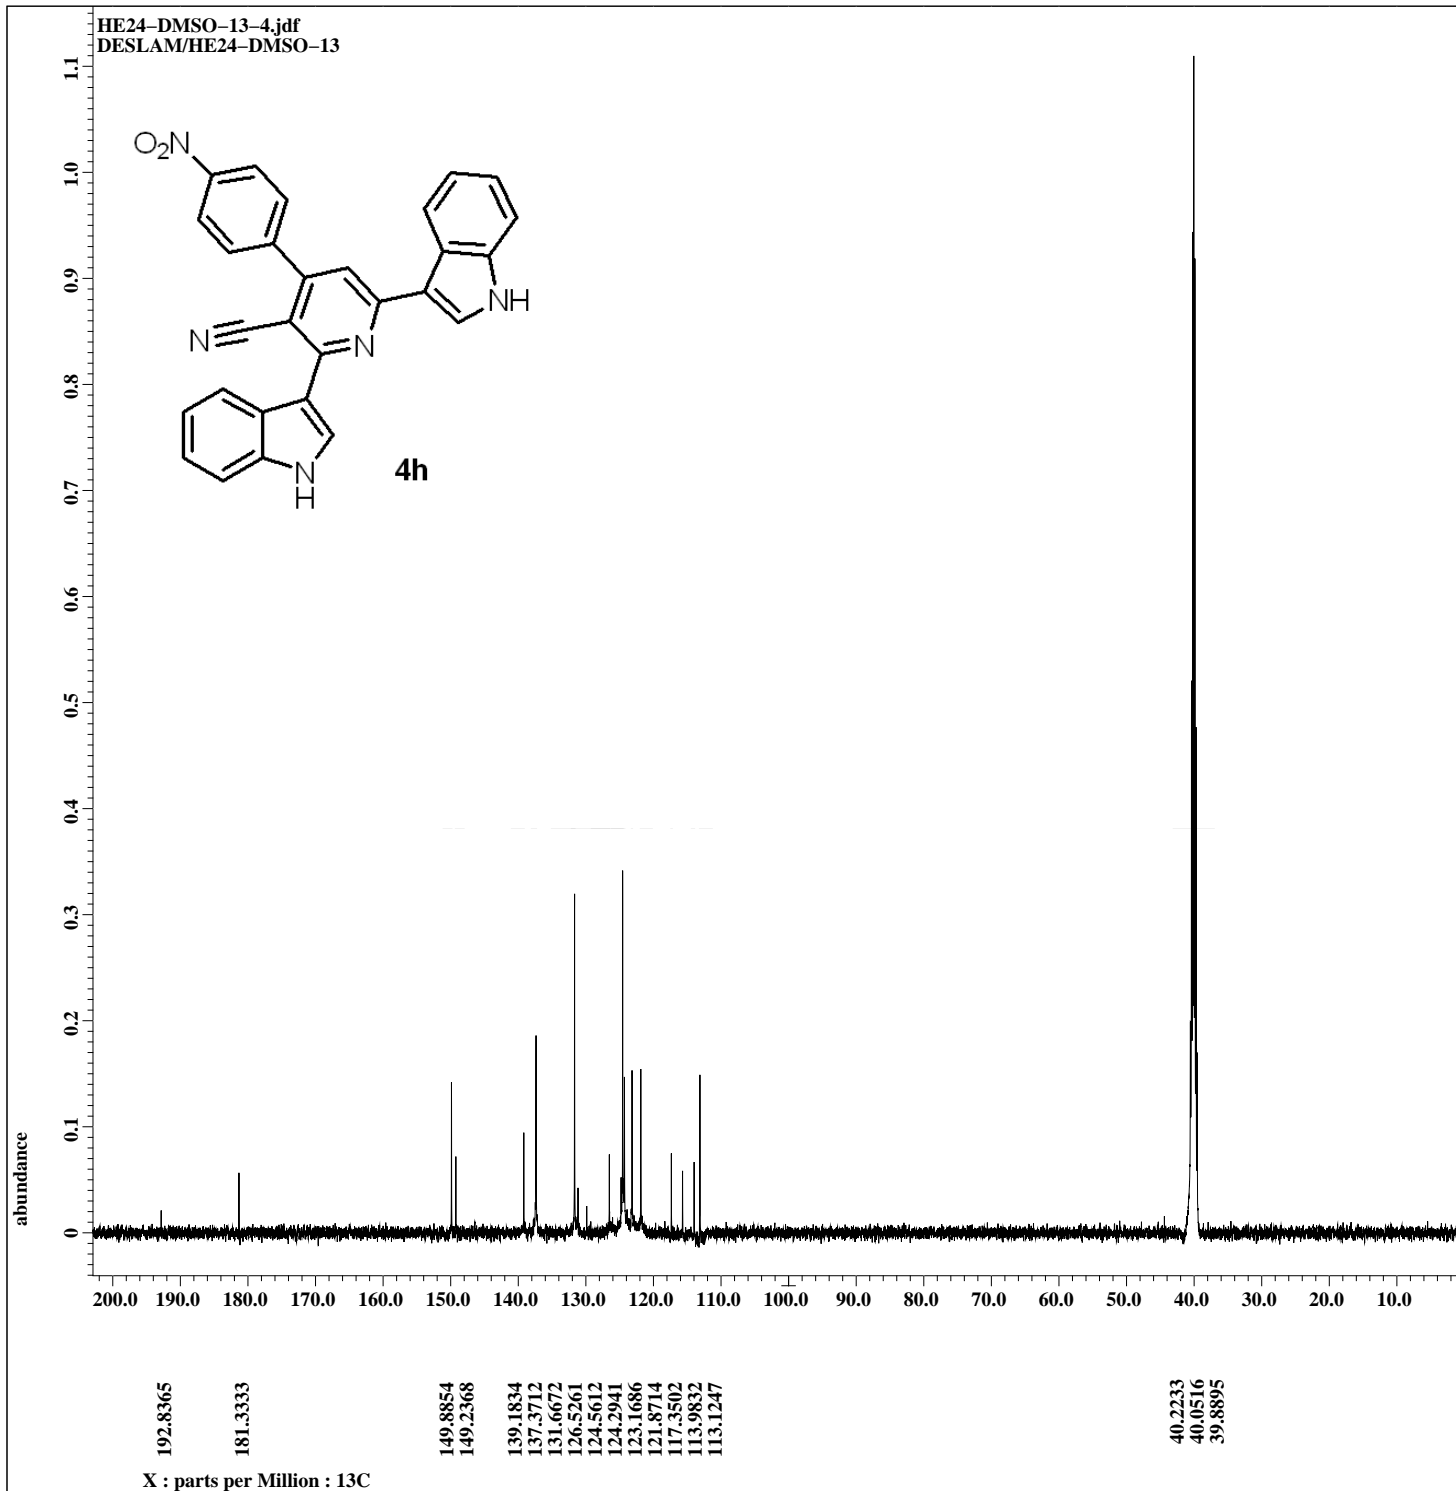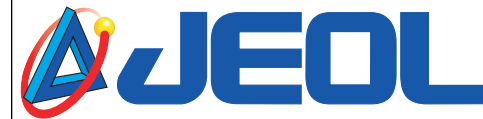

Author = delta3  
Content = DESLAM/HE24-DMSO  
Creation\_time = 14-DEC-2020 18:3  
Current\_time = 9-JUN-2021 11:4  
Data\_format = 1D\_REAL  
Dim\_size = 26214  
Dim\_title = 13C  
Dim\_units = [ppm]  
Dimensions = X  
Filename = HE24-DMSO-13-4.j  
Machine = scc  
Revision\_time = 9-JUN-2021 11:4  
Sample\_id = DESLAM/HE24-DMSO  
Site = ECA500 (Datum BL  
Spectrometer = DELTA2\_NMR  
Scans = 694  
Mod\_return = 1  
Total\_scans = 694  
X\_points = 32768  
X\_prescans = 4  
X\_domain = 13C  
X\_offset = 100[ppm]  
X\_freq = 125.76529768[MHz]  
X\_sweep = 39.3081761[kHz]  
X\_resolution = 1.19959034[Hz]  
Irr\_domain = 1H  
Irr\_offset = 5.0[ppm]  
Irr\_freq = 500.15991521[MHz]  
X\_acq\_duration = 0.83361792[s]  
Digital\_filter = TRUE  
Filter\_factor = 8  
Af\_version = 1  
Delay\_of\_start = 1.99999974[s]  
Actual\_start\_time = 14-DEC-2020 18:3  
Acq\_delay = 20.67[us]  
Digital\_filter\_status = 2P  
Clipped = TRUE  
Dc\_balanced = FALSE  
X90 = 13[us]  
Irr90 = 12[us]  
Tri90 = 10[us]  
Qua90 = 10[us]  
Qui90 = 10[us]  
Sex90 = 10[us]  
Sep90 = 10[us]  
Oct90 = 10[us]  
Non90 = 10[us]  
Dec90 = 10[us]  
X90\_hi = 0.118[ms]  
Irr90\_hi = 92[us]  
Tri90\_hi = 10[us]  
Qua90\_hi = 10[us]  
Qui90\_hi = 10[us]  
Sex90\_hi = 10[us]  
Sep90\_hi = 10[us]  
Oct90\_hi = 10[us]  
Non90\_hi = 10[us]  
Dec90\_hi = 10[us]  
X90\_lo = 0.118[ms]  
Irr90\_lo = 92[us]  
Tri90\_lo = 10[us]  
Qua90\_lo = 10[us]  
Qui90\_lo = 10[us]  
Sex90\_lo = 10[us]  
Sep90\_lo = 10[us]  
Oct90\_lo = 10[us]  
Non90\_lo = 10[us]  
Dec90\_lo = 10[us]  
X90\_spin = 1[us]  
Irr90\_spin = 38[us]

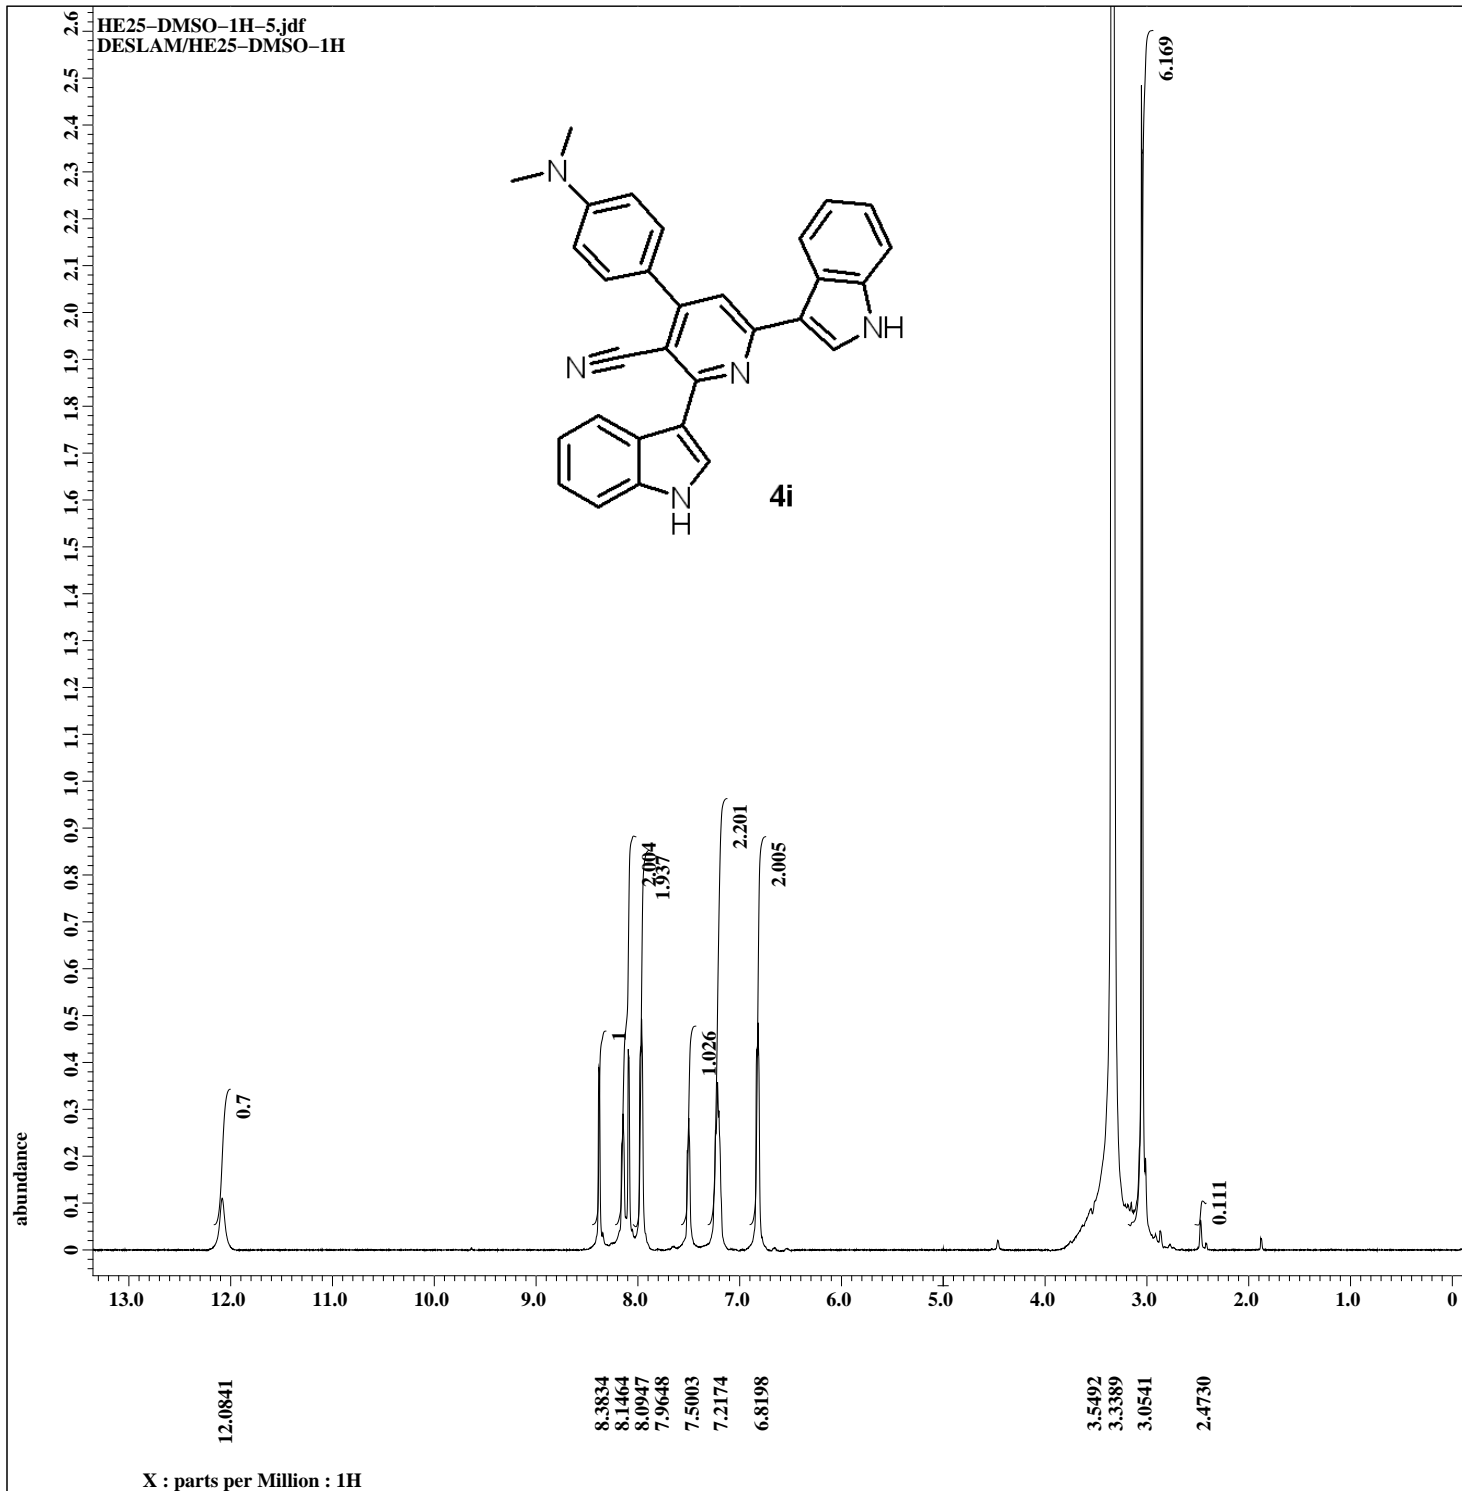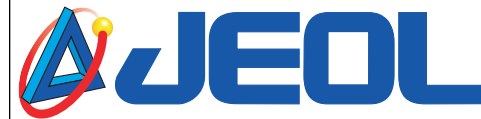

```

Author           = delta3
Content          = DESLAM/HE25-DMSO
Creation_time    = 15-DEC-2020 19:2
Current_time     = 9-JUN-2021 11:4
Data_format      = 1D REAL
Dim_size         = 13107
Dim_title        = 1H
Dim_units        = [ppm]
Dimensions       = X
Filename         = HE25-DMSO-1H-5.j
Machine          = scc
Revision_time    = 9-JUN-2021 11:4
Sample_id        = DESLAM/HE25-DMSO
Site             = ECA500 (Datum BL
Spectrometer     = DELTA2_NMR
Scans            = 16
Mod_return       = 1
Total_scans      = 16
X_points         = 16384
X_prescans       = 1
X_domain         = 1H
X_offset         = 5.0[ppm]
X_freq           = 500.15991521[MHz]
X_sweep          = 15.6641604[kHz]
X_resolution     = 0.95606448[Hz]
Irr_domain       = 1H
Irr_offset       = 5.0[ppm]
Irr_freq         = 500.15991521[MHz]
Tri_domain       = 1H
Tri_offset       = 5.0[ppm]
Tri_freq         = 500.15991521[MHz]
X_acq_duration   = 1.04595456[s]
Digital_filter   = TRUE
Filter_factor    = 8
Af_version       = 1
Delay_of_start   = 1.99999974[s]
Actual_start_time = 15-DEC-2020 19:2
Acq_delay        = 7.94[us]
Digital_filter_status = 2P
Clipped          = FALSE
Dc_balanced      = FALSE
X90              = 12[us]
Irr90            = 12[us]
Tri90            = 10[us]
Qua90            = 10[us]
Qui90            = 10[us]
Sex90            = 10[us]
Sep90            = 10[us]
Oct90            = 10[us]
Non90            = 10[us]
Dec90            = 10[us]
X90_hi           = 92[us]
Irr90_hi         = 92[us]
Tri90_hi         = 10[us]
Qua90_hi         = 10[us]
Qui90_hi         = 10[us]
Sex90_hi         = 10[us]
Sep90_hi         = 10[us]
Oct90_hi         = 10[us]
Non90_hi         = 10[us]
Dec90_hi         = 10[us]
X90_lo           = 92[us]
Irr90_lo         = 92[us]
Tri90_lo         = 10[us]
Qua90_lo         = 10[us]
Qui90_lo         = 10[us]
Sex90_lo         = 10[us]
Sep90_lo         = 10[us]
Oct90_lo         = 10[us]
Non90_lo         = 10[us]
  
```

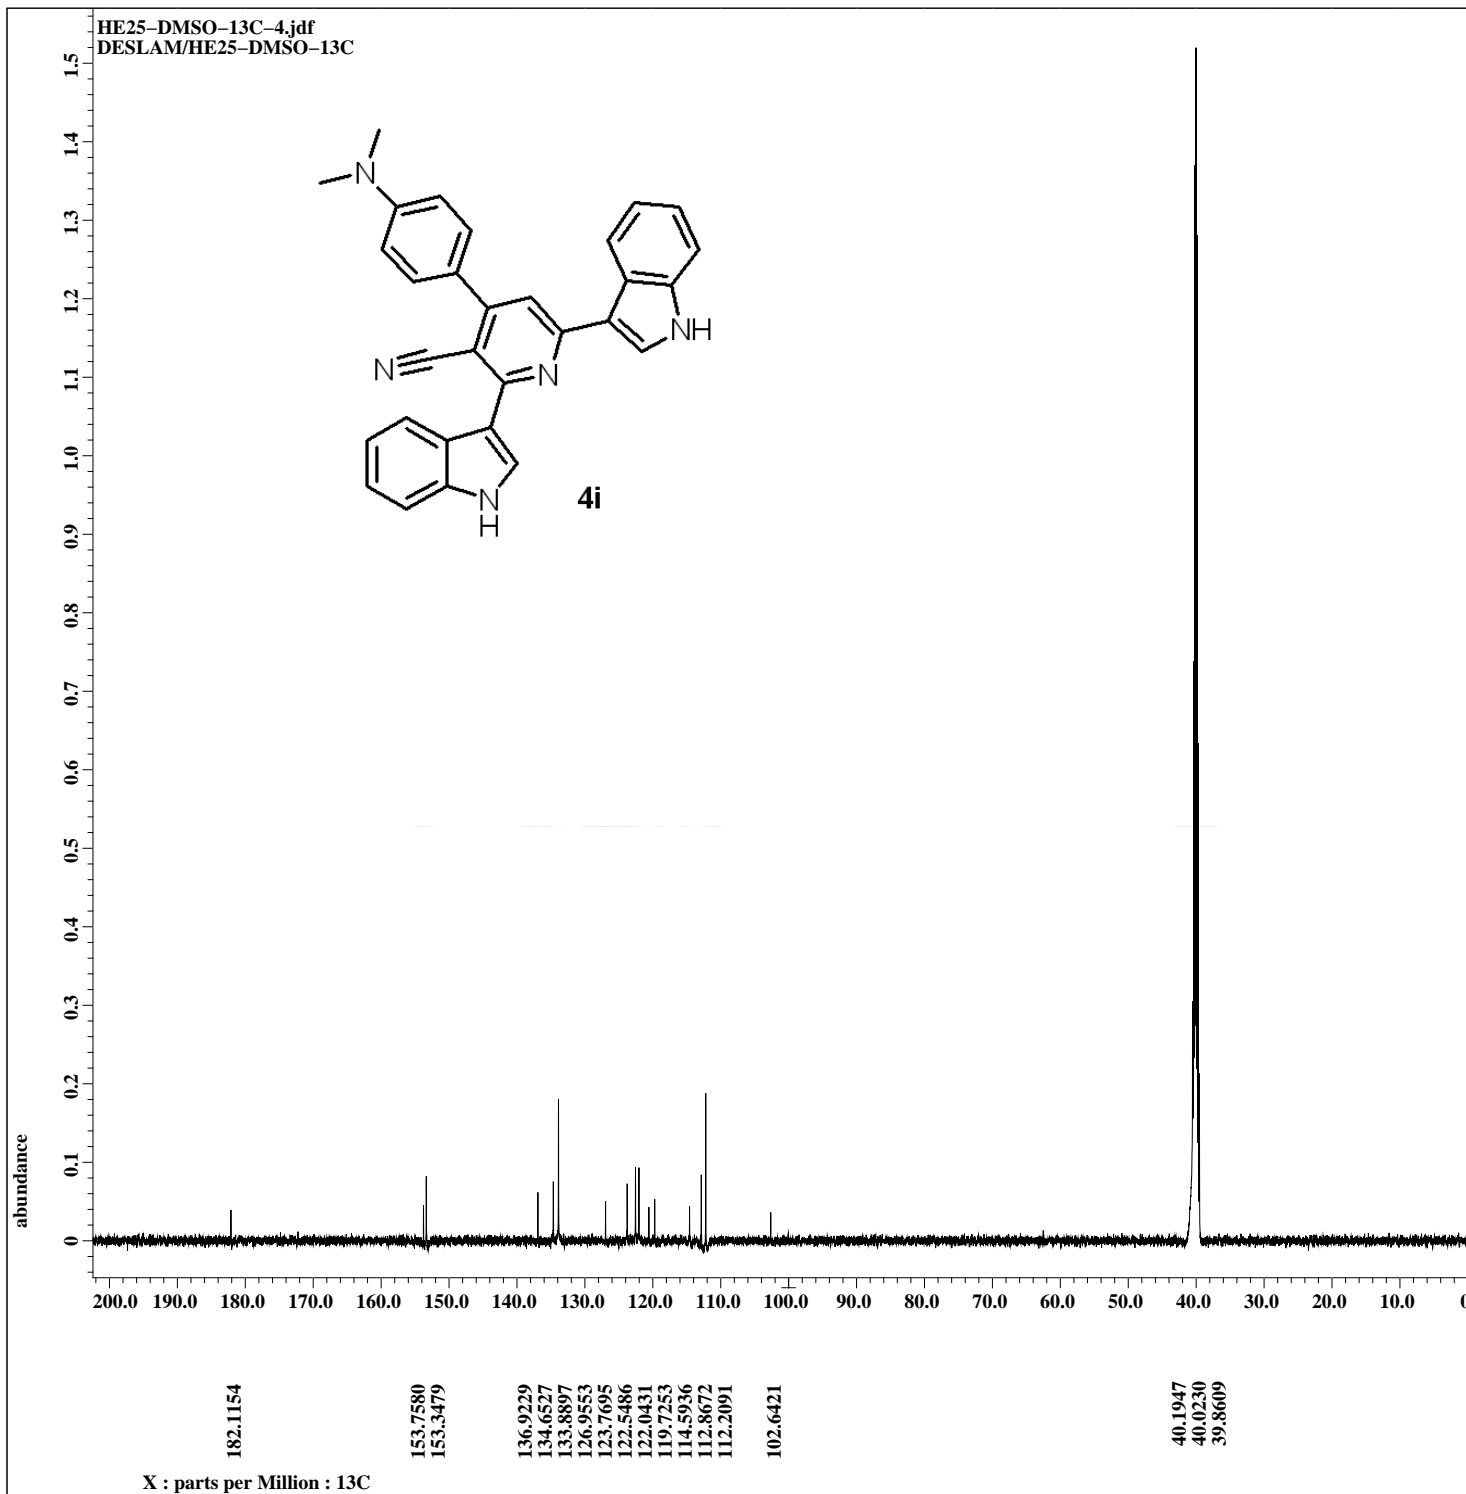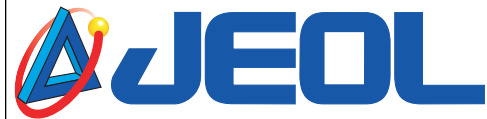

```

Author           = delta3
Content          = DESLAM/HE25-DMSO
Creation_time    = 16-DEC-2020 17:2
Current_time     = 9-JUN-2021 11:3
Data_format      = 1D_REAL
Dim_size         = 26214
Dim_title        = 13C
Dim_units        = [ppm]
Dimensions       = X
Filename         = HE25-DMSO-13C-4.
Machine          = scc
Revision_time    = 9-JUN-2021 11:3
Sample_id        = DESLAM/HE25-DMSO
Site             = ECA500 (Datum BL
Spectrometer     = DELTA2_NMR
Scans            = 843
Mod_return       = 1
Total_scans      = 843
X_points         = 32768
X_prescans       = 4
X_domain         = 13C
X_offset         = 100[ppm]
X_freq           = 125.76529768[MHz]
X_sweep          = 39.3081761[kHz]
X_resolution     = 1.19959034[Hz]
Irr_domain       = 1H
Irr_offset       = 5.0[ppm]
Irr_freq         = 500.15991521[MHz]
X_acq_duration   = 0.83361792[s]
Digital_filter   = TRUE
Filter_factor     = 8
Af_version       = 1
Delay_of_start   = 1.99999974[s]
Actual_start_time = 16-DEC-2020 17:2
Acq_delay        = 20.67[us]
Digital_filter_status = 2P
Clipped          = FALSE
Dc_balanced      = FALSE
X90              = 13[us]
Irr90            = 12[us]
Tri90            = 10[us]
Qua90            = 10[us]
Qui90            = 10[us]
Sex90            = 10[us]
Sep90            = 10[us]
Oct90            = 10[us]
Non90            = 10[us]
Dec90            = 10[us]
X90_hi           = 0.118[ms]
Irr90_hi         = 92[us]
Tri90_hi         = 10[us]
Qua90_hi         = 10[us]
Qui90_hi         = 10[us]
Sex90_hi         = 10[us]
Sep90_hi         = 10[us]
Oct90_hi         = 10[us]
Non90_hi         = 10[us]
Dec90_hi         = 10[us]
X90_lo           = 0.118[ms]
Irr90_lo         = 92[us]
Tri90_lo         = 10[us]
Qua90_lo         = 10[us]
Qui90_lo         = 10[us]
Sex90_lo         = 10[us]
Sep90_lo         = 10[us]
Oct90_lo         = 10[us]
Non90_lo         = 10[us]
Dec90_lo         = 10[us]
X90_spin         = 1[us]
Irr90_spin       = 38[us]

```

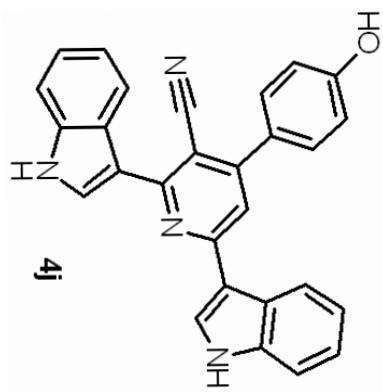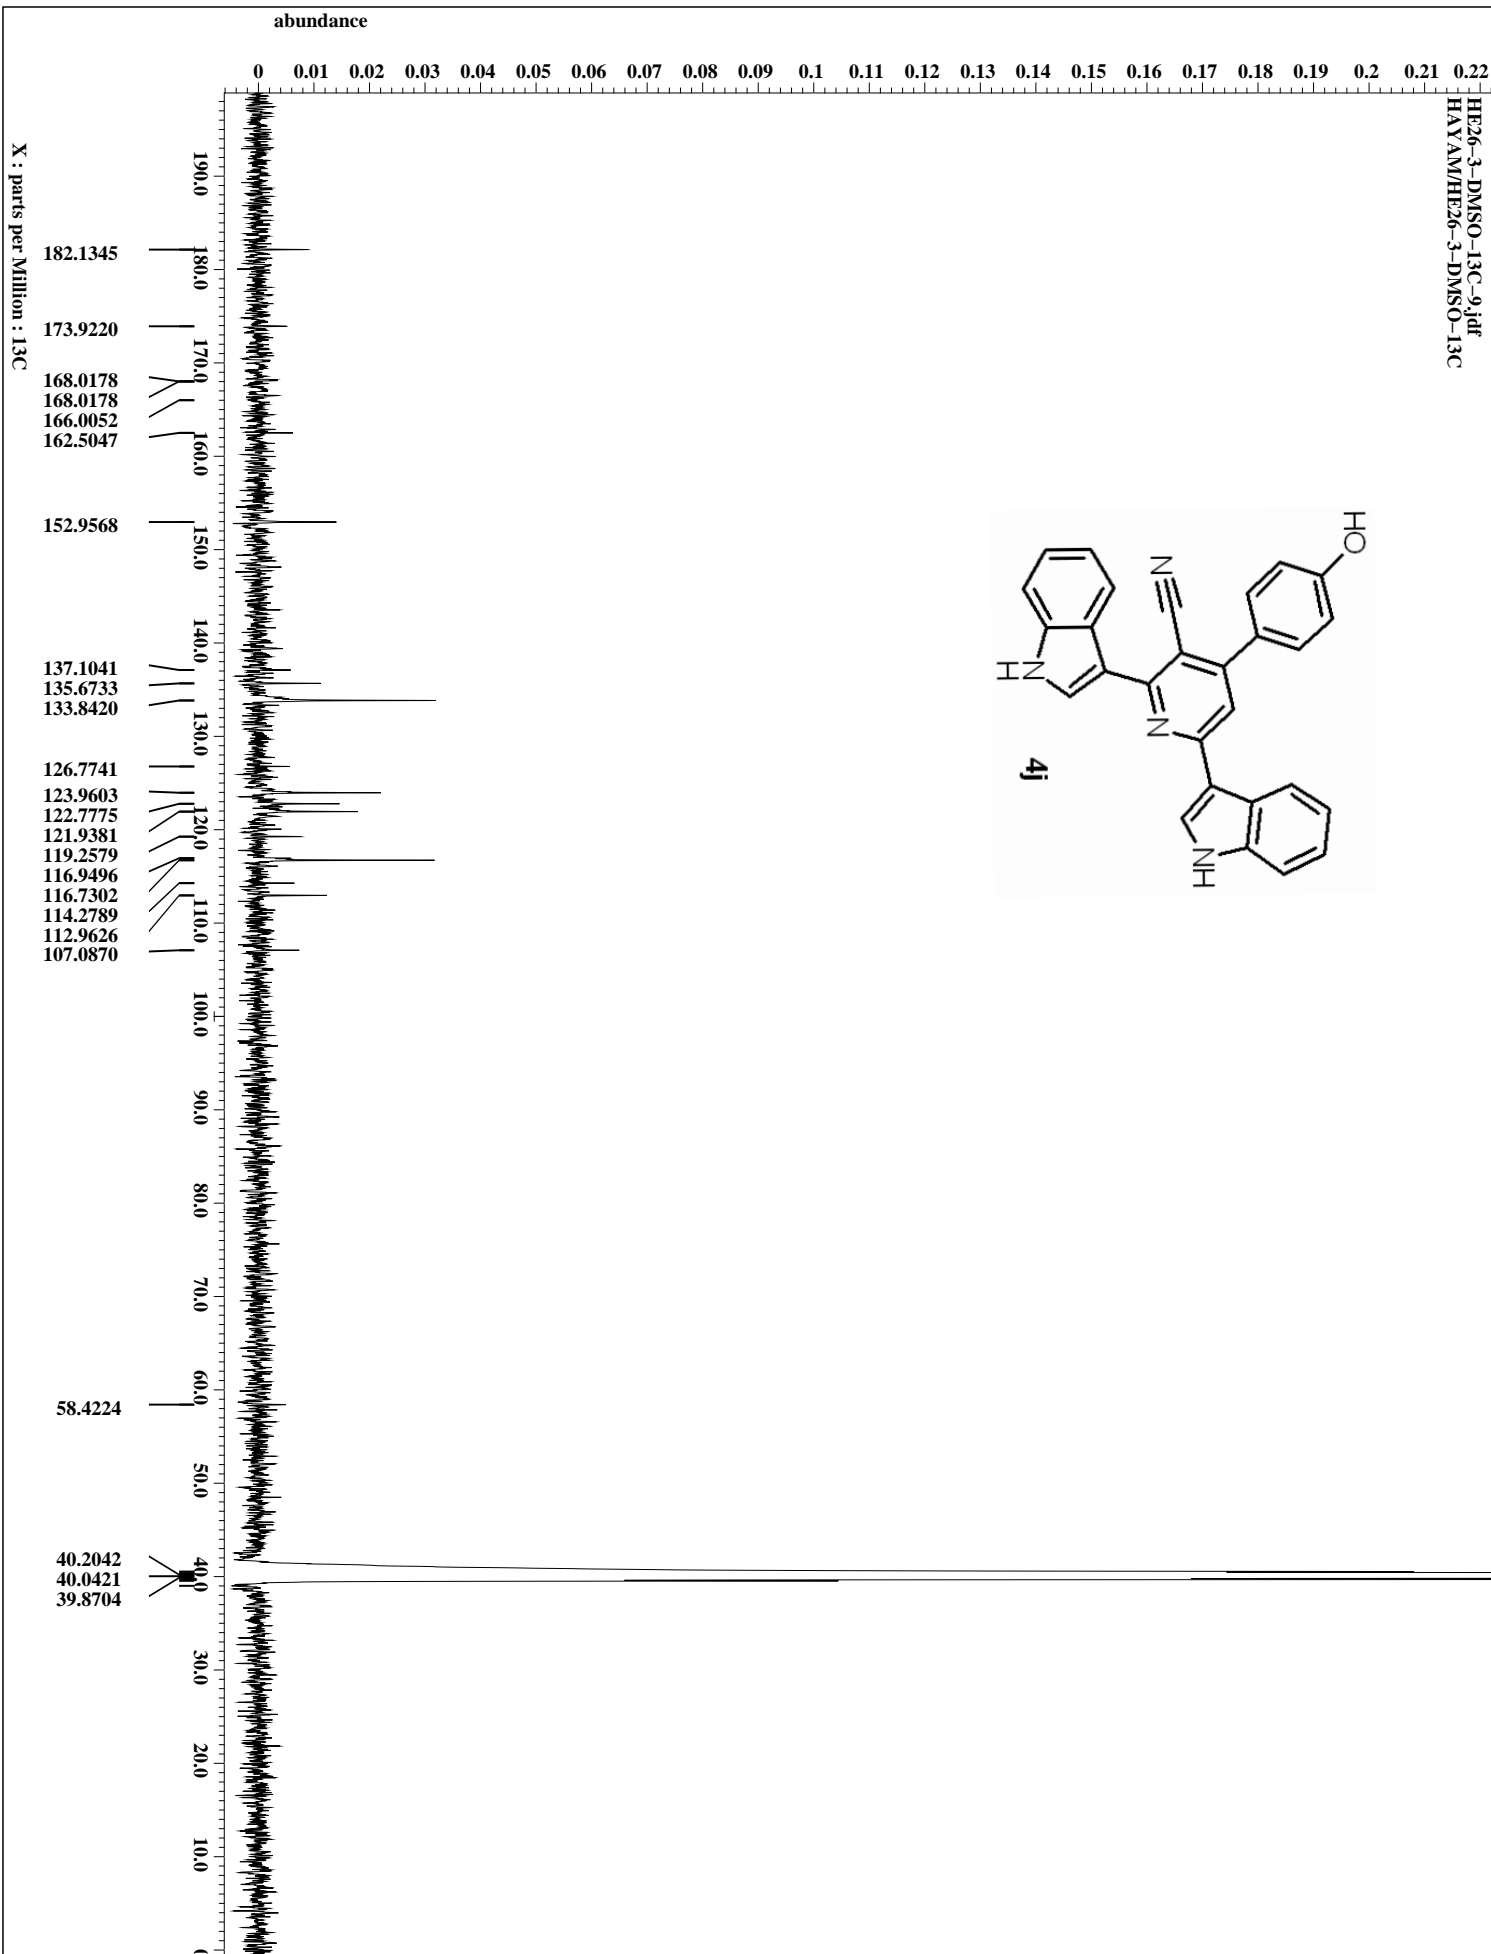



HE42-DMSO-13C\_copy-4.jdf  
EslamElsawy/HE42-DMSO-13C

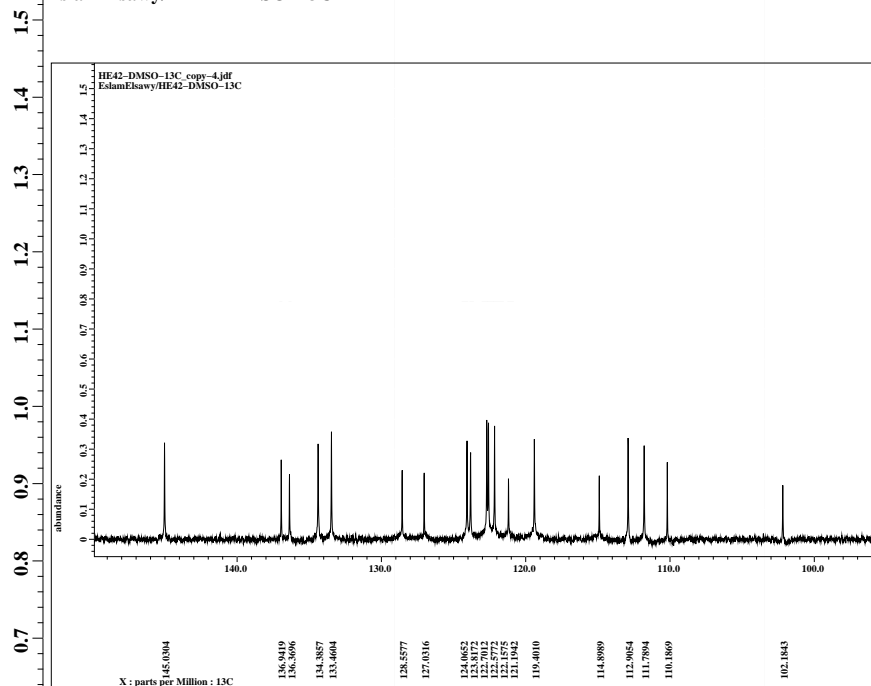

abundance

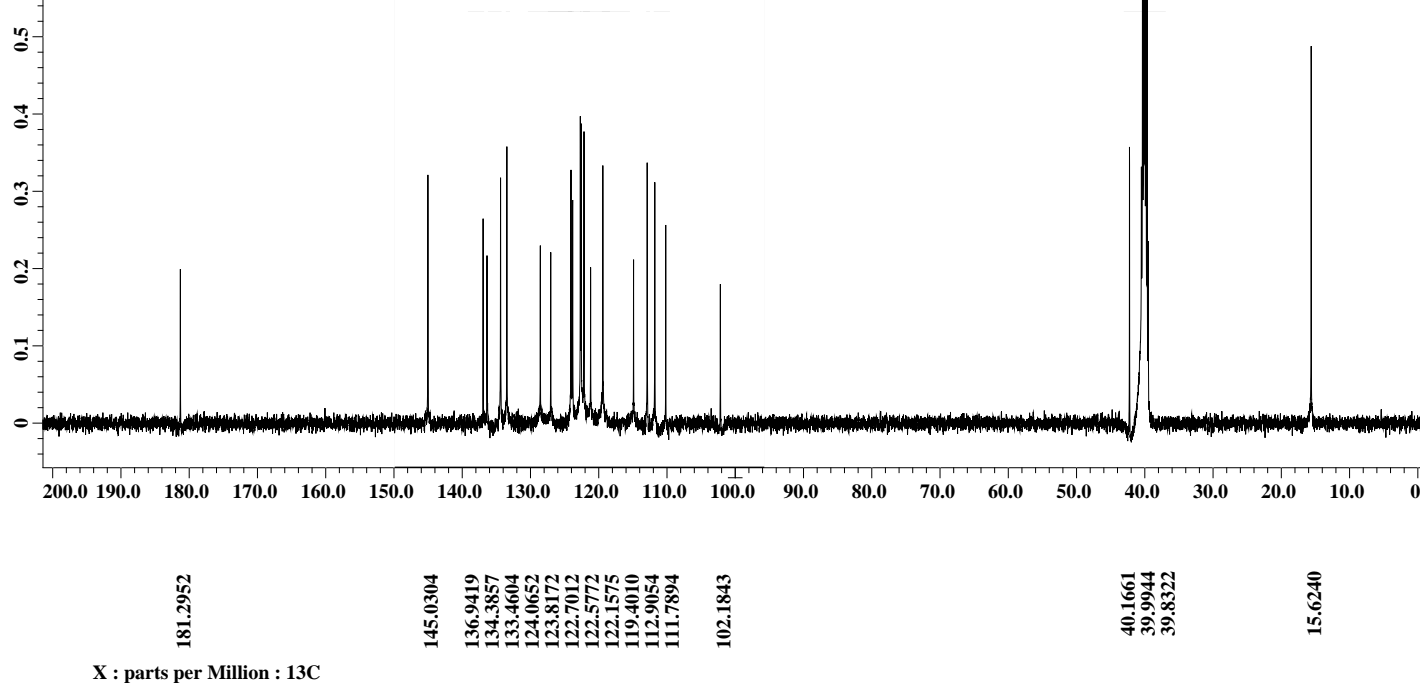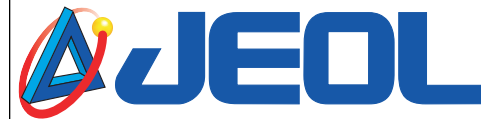

Author = delta3  
Content = EslamElsawy/HE42  
Creation\_time = 22-FEB-2021 19:0  
Current\_time = 22-FEB-2021 12:0  
Data\_format = 1D REAL  
Dim\_size = 26214  
Dim\_title = 13C  
Dim\_units = [ppm]

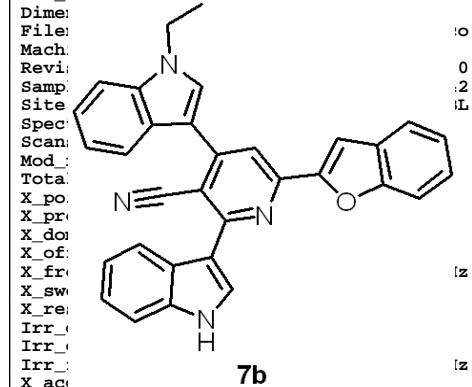

Digital\_filter = TRUE  
Filter\_factor = 8  
Af\_version = 1  
Delay\_of\_start = 1.99999974[s]  
Actual\_start\_time = 22-FEB-2021 19:0  
Acq\_delay = 20.67[us]  
Digital\_filter\_status = 2P  
Clipped = FALSE  
Dc\_balanced = FALSE  
X90 = 13[us]  
Irr90 = 12[us]  
Tri90 = 10[us]  
Qua90 = 10[us]  
Qui90 = 10[us]  
Sex90 = 10[us]  
Sep90 = 10[us]  
Oct90 = 10[us]  
Non90 = 10[us]  
Dec90 = 10[us]  
X90\_hi = 0.118[ms]  
Irr90\_hi = 92[us]  
Tri90\_hi = 10[us]  
Qua90\_hi = 10[us]  
Qui90\_hi = 10[us]  
Sex90\_hi = 10[us]  
Sep90\_hi = 10[us]  
Oct90\_hi = 10[us]  
Non90\_hi = 10[us]  
Dec90\_hi = 10[us]  
X90\_lo = 0.118[ms]  
Irr90\_lo = 92[us]  
Tri90\_lo = 10[us]  
Qua90\_lo = 10[us]  
Qui90\_lo = 10[us]  
Sex90\_lo = 10[us]  
Sep90\_lo = 10[us]  
Oct90\_lo = 10[us]  
Non90\_lo = 10[us]  
Dec90\_lo = 10[us]  
X90\_spin = 1[us]  
Irr90\_spin = 38[us]

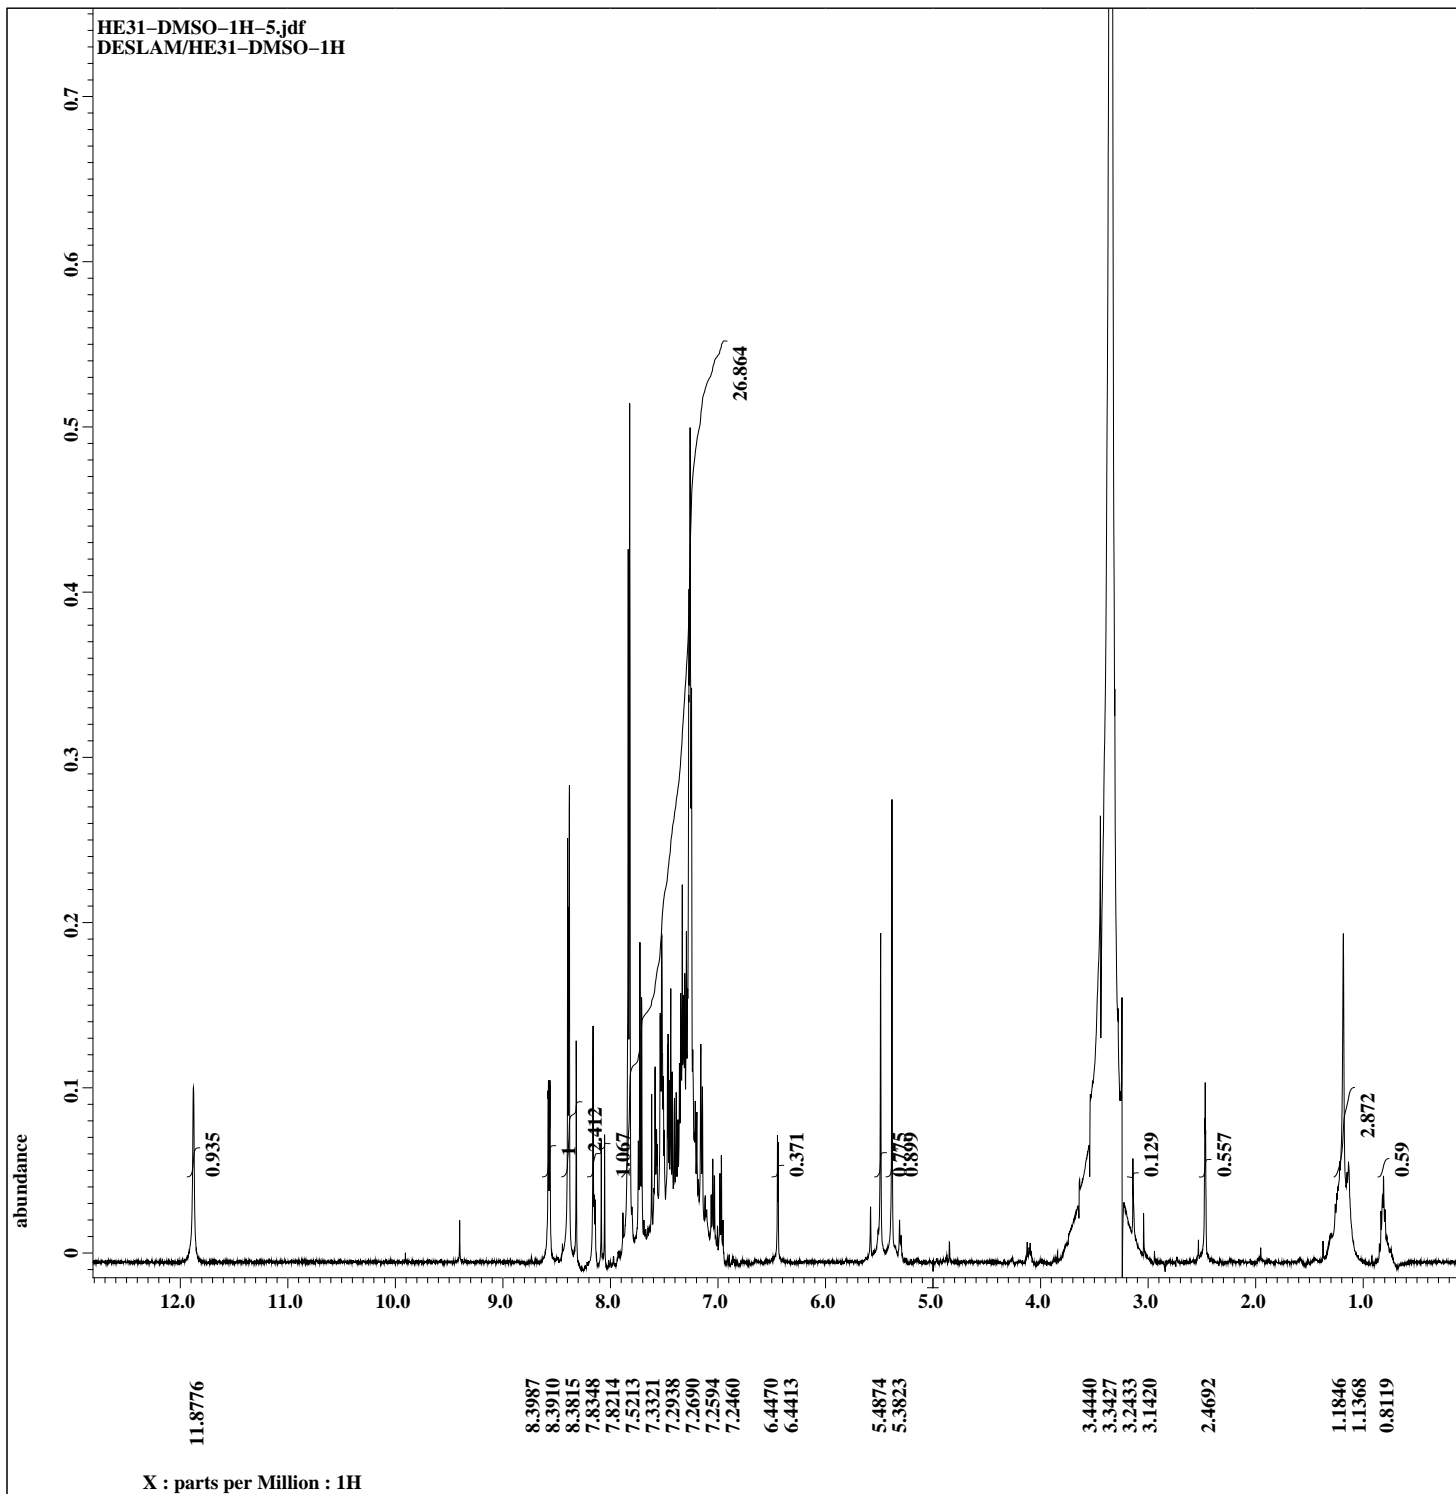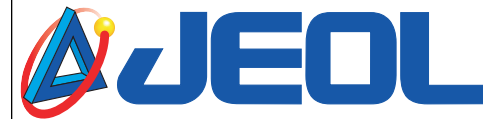

Author = delta3  
Content = DESLAM/HE31-DMSO  
Creation\_time = 24-DEC-2020 18:5  
Current\_time = 9-JUN-2021 11:3  
Data\_format = 1D REAL  
Dim\_size = 13107  
Dim\_title = 1H  
Dim\_units = [ppm]  
Dimensions = X  
Filename = HE31-DMSO-1H-5.j  
Machine = scc  
Revision\_time = 9-JUN-2021 11:3  
Sample\_id = DESLAM/HE31-DMSO  
Site = ECA500 (Datum BL  
Spectrometer = DELTA2\_NMR  
Scans = 16  
Mod\_return = 1  
Total\_scans = 16  
X\_points = 16384  
X\_prescans = 1  
X\_domain = 1H  
X\_offset = 5.0[ppm]  
X\_freq = 500.15991521[MHz]  
X\_sweep = 15.6641604[kHz]  
X\_resolution = 0.95606448[Hz]  
Irr\_domain = 1H  
Irr\_offset = 5.0[ppm]  
Irr\_freq = 500.15991521[MHz]  
Tri\_domain = 1H  
Tri\_offset = 5.0[ppm]  
Tri\_freq = 500.15991521[MHz]  
X\_acq\_duration = 1.04595456[s]  
Digital\_filter = TRUE  
Filter\_factor = 8  
Af\_version = 1  
Delay\_of\_start = 1.99999974[s]  
Actual\_start\_time = 24-DEC-2020 18:5  
Acq\_delay = 7.94[us]  
Digital\_filter\_status = 2P  
Clipped = FALSE  
Dc\_balanced = FALSE  
X90 = 12[us]  
Irr90 = 12[us]  
Tri90 = 10[us]  
Qua90 = 10[us]  
Qui90 = 10[us]  
Sex90 = 10[us]  
Sep90 = 10[us]  
Oct90 = 10[us]  
Non90 = 10[us]  
Dec90 = 10[us]  
X90\_hi = 92[us]  
Irr90\_hi = 92[us]  
Tri90\_hi = 10[us]  
Qua90\_hi = 10[us]  
Qui90\_hi = 10[us]  
Sex90\_hi = 10[us]  
Sep90\_hi = 10[us]  
Oct90\_hi = 10[us]  
Non90\_hi = 10[us]  
Dec90\_hi = 10[us]  
X90\_lo = 92[us]  
Irr90\_lo = 92[us]  
Tri90\_lo = 10[us]  
Qua90\_lo = 10[us]  
Qui90\_lo = 10[us]  
Sex90\_lo = 10[us]  
Sep90\_lo = 10[us]  
Oct90\_lo = 10[us]  
Non90\_lo = 10[us]

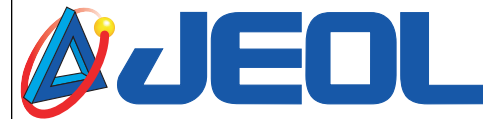

Author = delta3  
 Content = EslamElsawy/HE44  
 Creation\_time = 18-FEB-2021 19:4  
 Current\_time = 18-FEB-2021 12:4  
 Data\_format = 1D REAL  
 Dim\_size = 13107  
 Dim\_title = 1H  
 Dim\_units = [ppm]

SO-1H-5.j  
 2021 12:4  
 sawy/HE44  
 (Datum BL  
 NMR

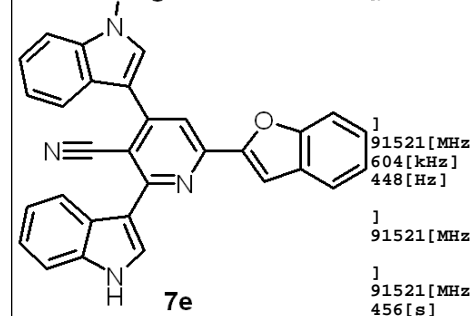

Digital\_filter = TRUE  
 Filter\_factor = 8  
 Af\_version = 1  
 Delay\_of\_start = 1.99999974[s]  
 Actual\_start\_time = 18-FEB-2021 19:4  
 Acq\_delay = 7.94[us]  
 Digital\_filter\_status = 2P  
 Clipped = FALSE  
 Dc\_balanced = FALSE  
 X90 = 12[us]  
 Irr90 = 12[us]  
 Tri90 = 10[us]  
 Qua90 = 10[us]  
 Qui90 = 10[us]  
 Sex90 = 10[us]  
 Sep90 = 10[us]  
 Oct90 = 10[us]  
 Non90 = 10[us]  
 Dec90 = 10[us]  
 X90\_hi = 92[us]  
 Irr90\_hi = 92[us]  
 Tri90\_hi = 10[us]  
 Qua90\_hi = 10[us]  
 Qui90\_hi = 10[us]  
 Sex90\_hi = 10[us]  
 Sep90\_hi = 10[us]  
 Oct90\_hi = 10[us]  
 Non90\_hi = 10[us]  
 Dec90\_hi = 10[us]  
 X90\_lo = 92[us]  
 Irr90\_lo = 92[us]  
 Tri90\_lo = 10[us]  
 Qua90\_lo = 10[us]  
 Qui90\_lo = 10[us]  
 Sex90\_lo = 10[us]  
 Sep90\_lo = 10[us]  
 Oct90\_lo = 10[us]  
 Non90\_lo = 10[us]

HE44-DMSO-1H-5.jdf  
 EslamElsawy/HE44-DMSO-1H

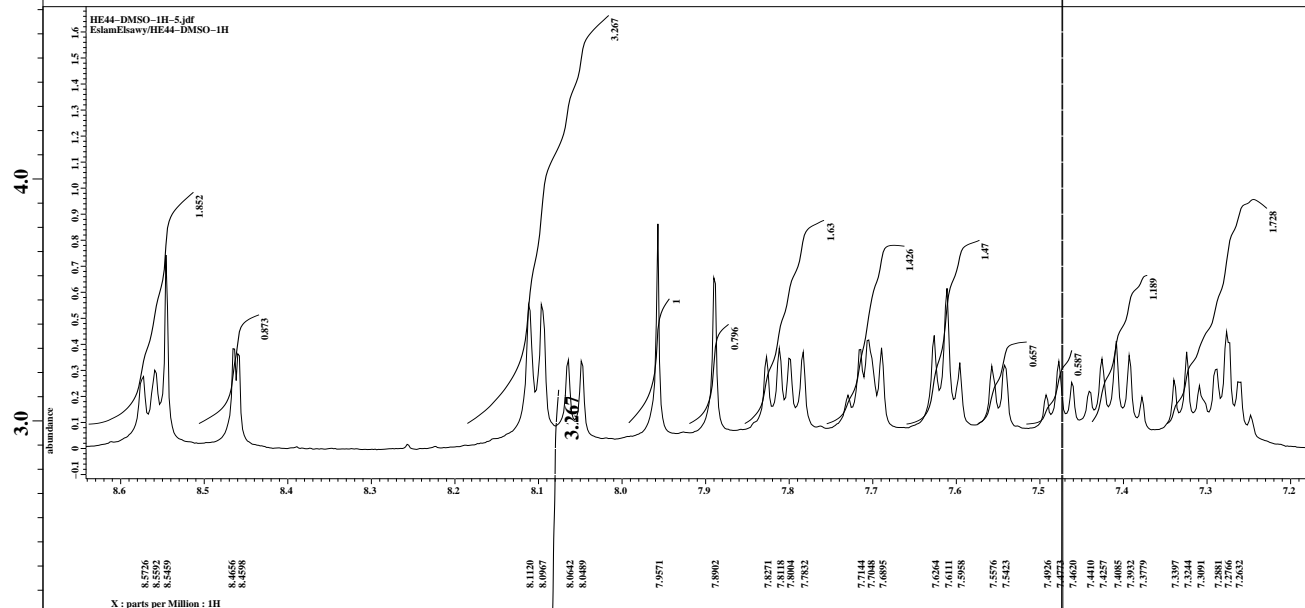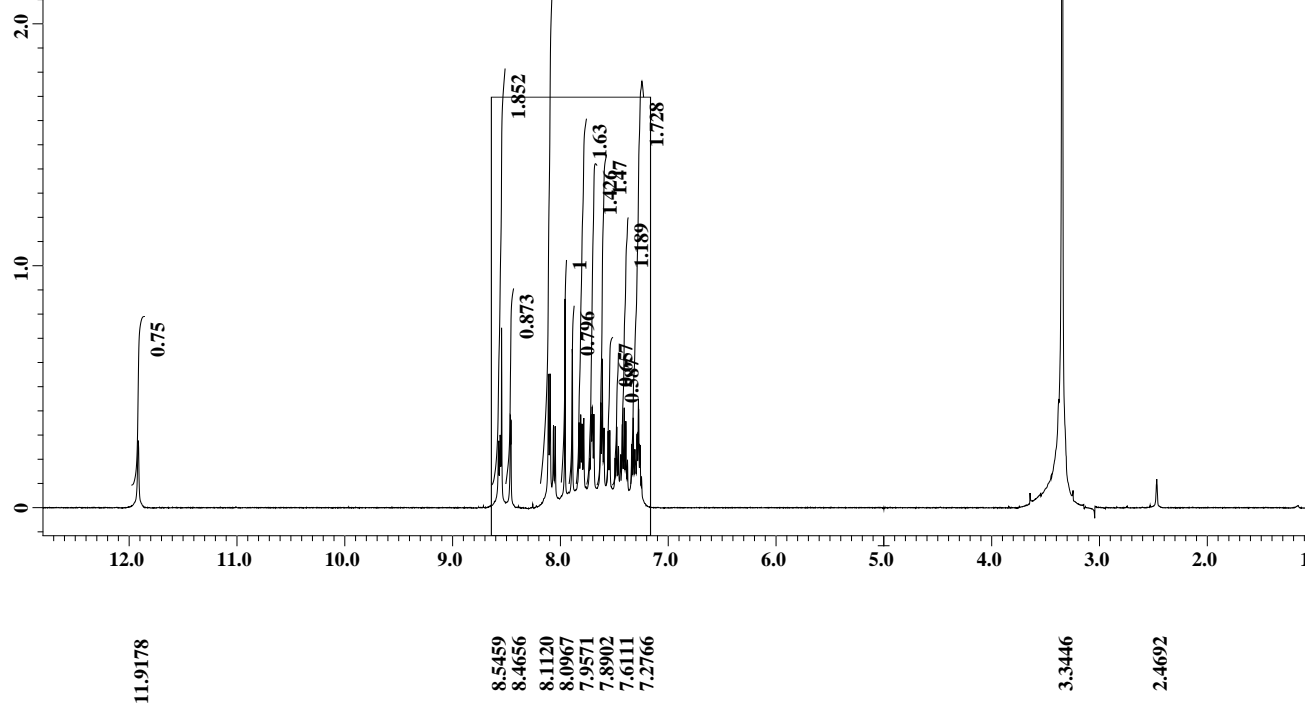

HE44-DMSO-13C-3.jdf  
EslamElsawy/HE44-DMSO-13C

1.3  
1.2  
1.1  
1.0  
0.9  
0.8  
0.7  
0.6  
0.5  
0.4  
0.3  
0.2  
0.1  
0  
abundance

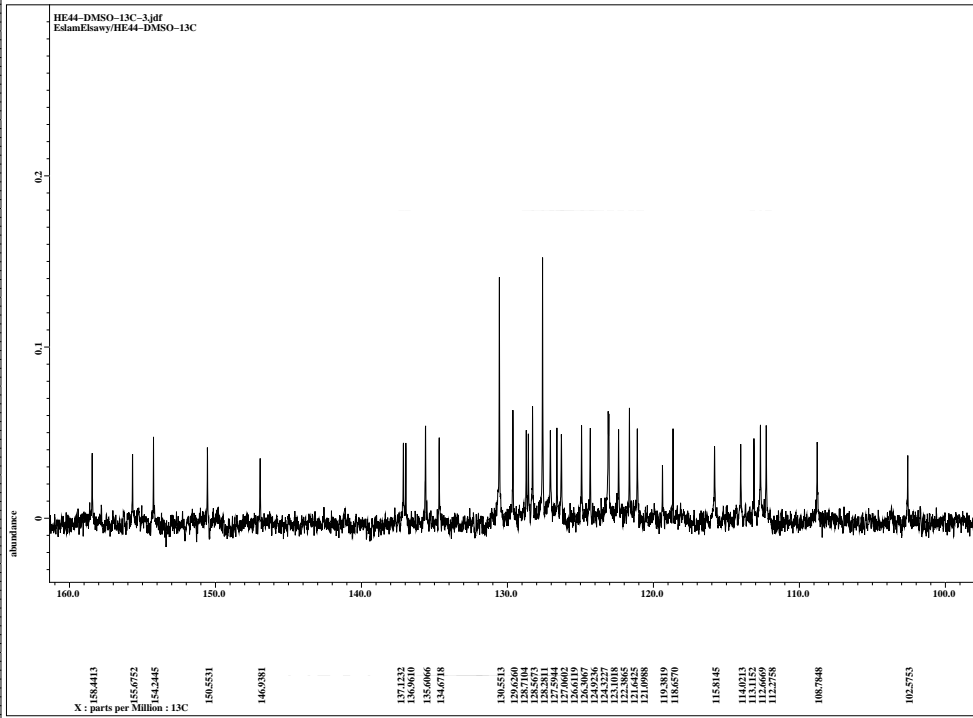

abundance

200.0 190.0 180.0 170.0 160.0 150.0 140.0 130.0 120.0 110.0 100.0 90.0 80.0 70.0 60.0 50.0 40.0 30.0 20.0 10.0

158.4413  
155.6752  
154.2445  
150.5531  
146.9381  
135.6066  
130.5513  
129.6260  
128.2811  
127.5944  
126.6119  
124.9236  
124.3227  
123.1018  
121.6425  
121.6669  
112.2758  
102.5753

X : parts per Million : 13C

40.2042  
40.0421  
39.8704

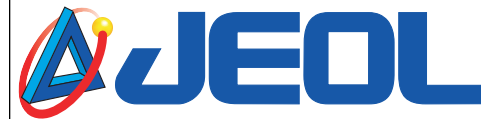

Author = delta3  
Content = EslamElsawy/HE44  
Creation\_time = 18-FEB-2021 20:3  
Current\_time = 22-FEB-2021 11:5  
Data\_format = 1D COMPLEX  
Dim\_size = 26214  
Dim\_title = 13C  
Dim\_units = [ppm]

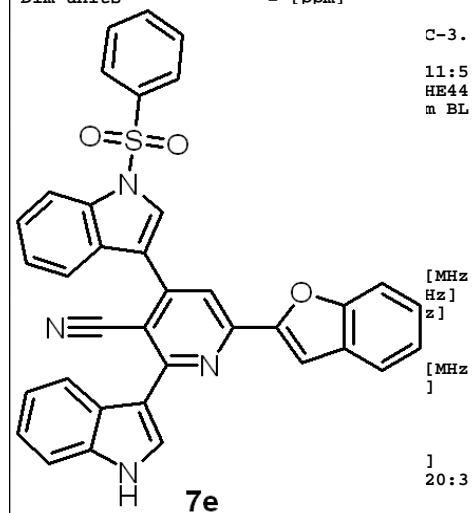

Clipped = FALSE  
Dc\_balanced = FALSE  
X90 = 13[us]  
Irr90 = 12[us]  
Tri90 = 10[us]  
Qua90 = 10[us]  
Qui90 = 10[us]  
Sex90 = 10[us]  
Sep90 = 10[us]  
Oct90 = 10[us]  
Non90 = 10[us]  
Dec90 = 10[us]  
X90\_hi = 0.118[ms]  
Irr90\_hi = 92[us]  
Tri90\_hi = 10[us]  
Qua90\_hi = 10[us]  
Qui90\_hi = 10[us]  
Sex90\_hi = 10[us]  
Sep90\_hi = 10[us]  
Oct90\_hi = 10[us]  
Non90\_hi = 10[us]  
Dec90\_hi = 10[us]  
X90\_lo = 0.118[ms]  
Irr90\_lo = 92[us]  
Tri90\_lo = 10[us]  
Qua90\_lo = 10[us]  
Qui90\_lo = 10[us]  
Sex90\_lo = 10[us]  
Sep90\_lo = 10[us]  
Oct90\_lo = 10[us]  
Non90\_lo = 10[us]  
Dec90\_lo = 10[us]  
X90\_spin = 1[us]  
Irr90\_spin = 38[us]

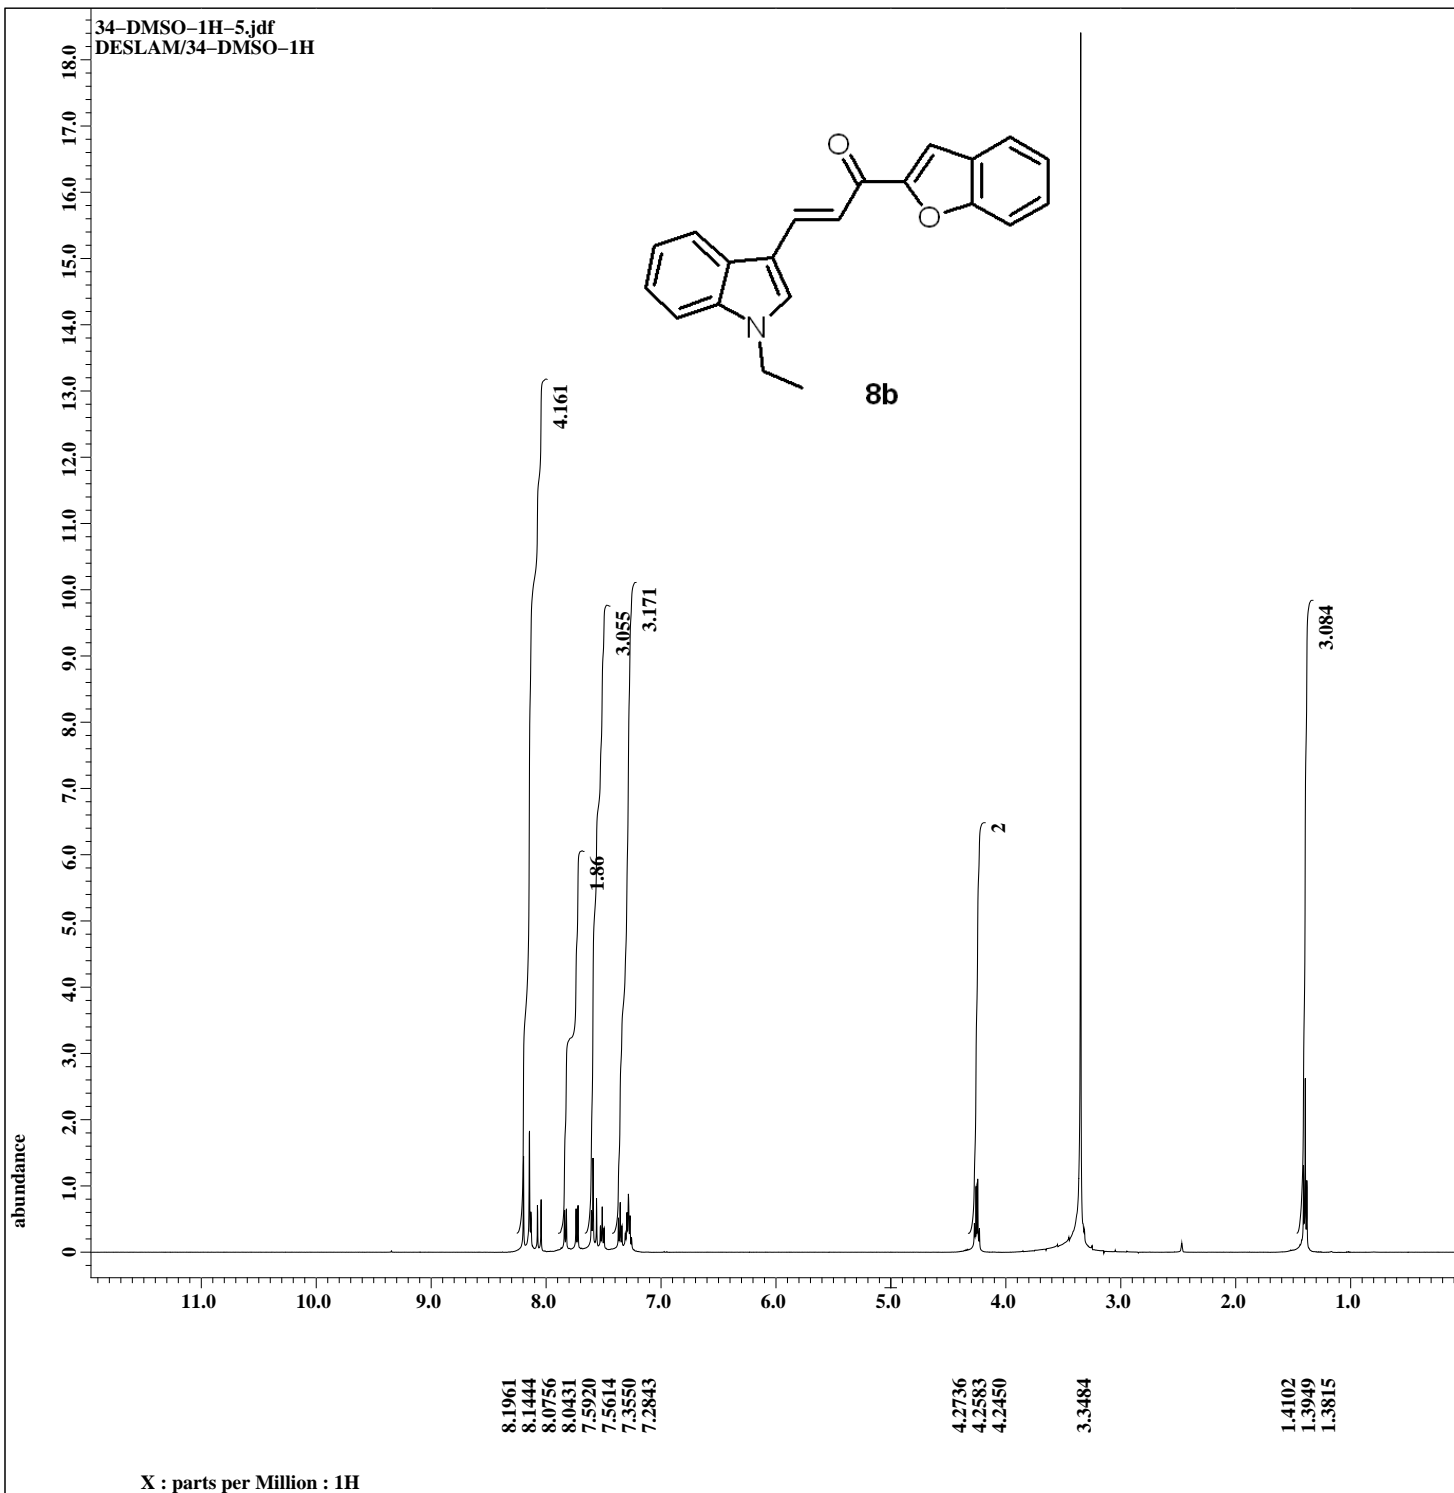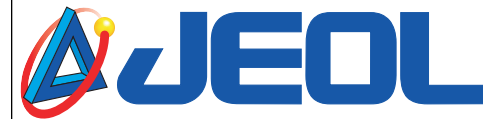

```

Author          = delta3
Content         = DESLAM/34-DMSO-1
Creation_time   = 16-DEC-2020 18:5
Current_time    = 9-JUN-2021 11:2
Data_format     = 1D REAL
Dim_size        = 13107
Dim_title       = 1H
Dim_units       = [ppm]
Dimensions      = X
Filename        = 34-DMSO-1H-5.jdf
Machine         = scc
Revision_time   = 9-JUN-2021 11:2
Sample_id       = DESLAM/34-DMSO-1
Site            = ECA500 (Datum BL
Spectrometer    = DELTA2_NMR
Scans           = 16
Mod_return      = 1
Total_scans     = 16
X_points        = 16384
X_prescans      = 1
X_domain        = 1H
X_offset        = 5.0[ppm]
X_freq          = 500.15991521[MHz]
X_sweep         = 15.6641604[kHz]
X_resolution    = 0.95606448[Hz]
Irr_domain      = 1H
Irr_offset      = 5.0[ppm]
Irr_freq        = 500.15991521[MHz]
Tri_domain      = 1H
Tri_offset      = 5.0[ppm]
Tri_freq        = 500.15991521[MHz]
X_acq_duration  = 1.04595456[s]
Digital_filter  = TRUE
Filter_factor   = 8
Af_version      = 1
Delay_of_start  = 1.99999974[s]
Actual_start_time = 16-DEC-2020 18:5
Acq_delay       = 7.94[us]
Digital_filter_status = 2P
Clipped         = FALSE
Dc_balanced     = FALSE
X90             = 12[us]
Irr90           = 12[us]
Tri90           = 10[us]
Qua90           = 10[us]
Qui90           = 10[us]
Sex90           = 10[us]
Sep90           = 10[us]
Oct90           = 10[us]
Non90           = 10[us]
Dec90           = 10[us]
X90_hi          = 92[us]
Irr90_hi        = 92[us]
Tri90_hi        = 10[us]
Qua90_hi        = 10[us]
Qui90_hi        = 10[us]
Sex90_hi        = 10[us]
Sep90_hi        = 10[us]
Oct90_hi        = 10[us]
Non90_hi        = 10[us]
Dec90_hi        = 10[us]
X90_lo          = 92[us]
Irr90_lo        = 92[us]
Tri90_lo        = 10[us]
Qua90_lo        = 10[us]
Qui90_lo        = 10[us]
Sex90_lo        = 10[us]
Sep90_lo        = 10[us]
Oct90_lo        = 10[us]
Non90_lo        = 10[us]

```

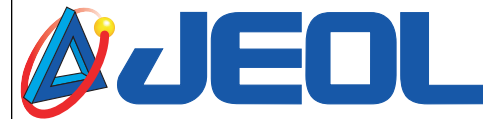

Author = delta3  
Content = ESLAM/HE15-DMSO-  
Creation\_time = 8-JUN-2021 18:2  
Current\_time = 8-JUN-2021 11:1  
Data\_format = 1D REAL  
Dim\_size = 13107  
Dim\_title = 1H  
Dim\_units = [ppm]  
Dimensions = X  
Filename = HE15-DMSO-1H-6.j  
Machine = scc  
Revision\_time = 8-JUN-2021 11:1  
Sample\_id = ESLAM/HE15-DMSO-  
Site = ECA500 (Datum BL  
Spectrometer = DELTA2\_NMR  
Scans = 16  
Mod\_return = 1  
Total\_scans = 16  
X\_points = 16384  
X\_prescans = 1  
X\_domain = 1H  
X\_offset = 5.0[ppm]  
X\_freq = 500.15991521[MHz]  
X\_sweep = 15.6641604[kHz]  
X\_resolution = 0.95606448[Hz]  
Irr\_domain = 1H  
Irr\_offset = 5.0[ppm]  
Irr\_freq = 500.15991521[MHz]  
Tri\_domain = 1H  
Tri\_offset = 5.0[ppm]  
Tri\_freq = 500.15991521[MHz]  
X\_acq\_duration = 1.04595456[s]  
Digital\_filter = TRUE  
Filter\_factor = 8  
Af\_version = 1  
Delay\_of\_start = 1.99999974[s]  
Actual\_start\_time = 8-JUN-2021 18:1  
Acq\_delay = 7.94[us]  
Digital\_filter\_status = 2P  
Clipped = FALSE  
Dc\_balanced = FALSE  
X90 = 12[us]  
Irr90 = 12[us]  
Tri90 = 10[us]  
Qua90 = 10[us]  
Qui90 = 10[us]  
Sex90 = 10[us]  
Sep90 = 10[us]  
Oct90 = 10[us]  
Non90 = 10[us]  
Dec90 = 10[us]  
X90\_hi = 92[us]  
Irr90\_hi = 92[us]  
Tri90\_hi = 10[us]  
Qua90\_hi = 10[us]  
Qui90\_hi = 10[us]  
Sex90\_hi = 10[us]  
Sep90\_hi = 10[us]  
Oct90\_hi = 10[us]  
Non90\_hi = 10[us]  
Dec90\_hi = 10[us]  
X90\_lo = 92[us]  
Irr90\_lo = 92[us]  
Tri90\_lo = 10[us]  
Qua90\_lo = 10[us]  
Qui90\_lo = 10[us]  
Sex90\_lo = 10[us]  
Sep90\_lo = 10[us]  
Oct90\_lo = 10[us]  
Non90\_lo = 10[us]

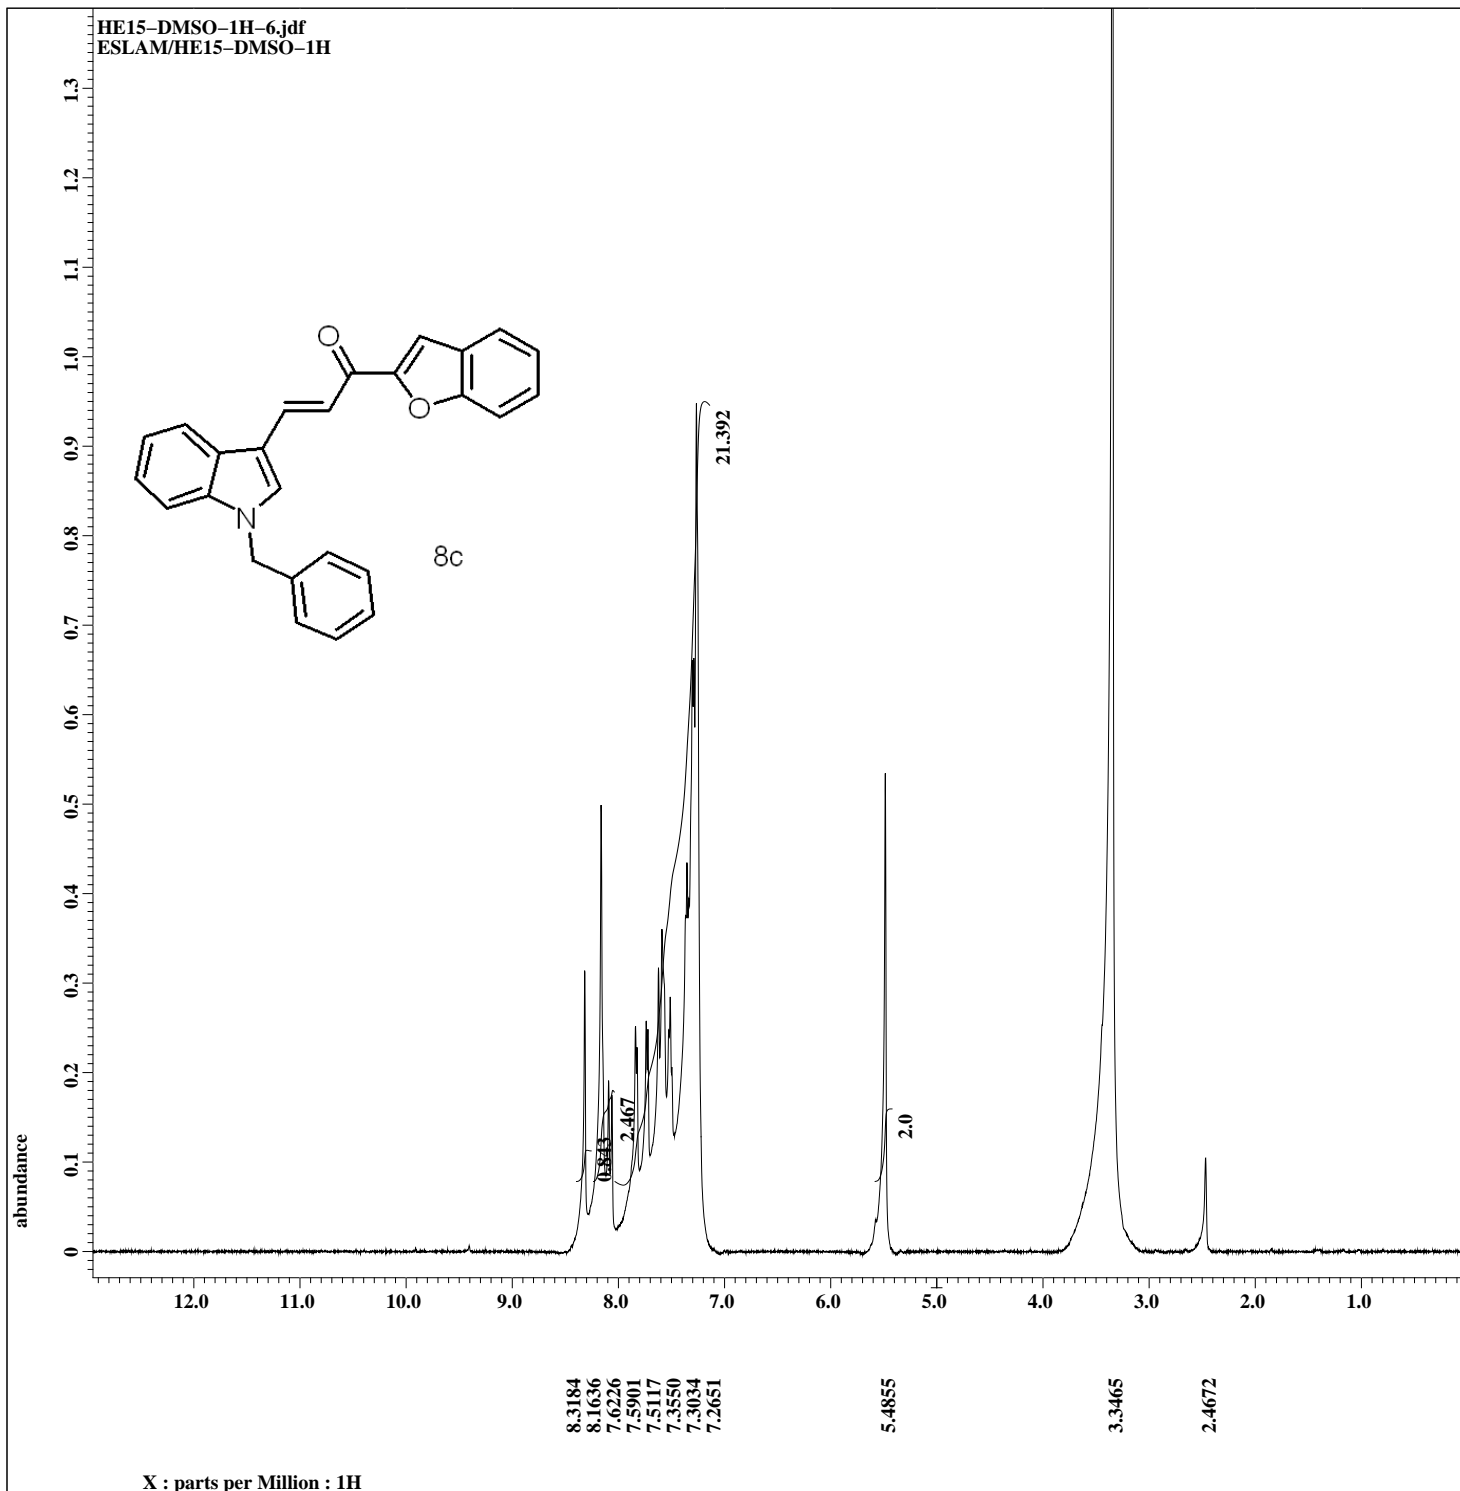

X :  
1H

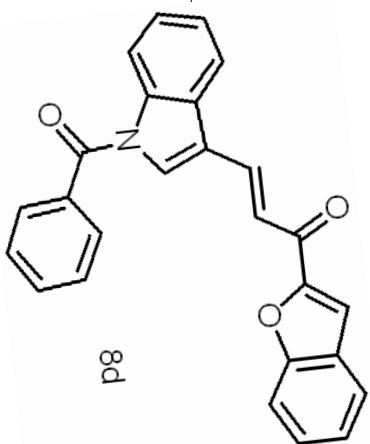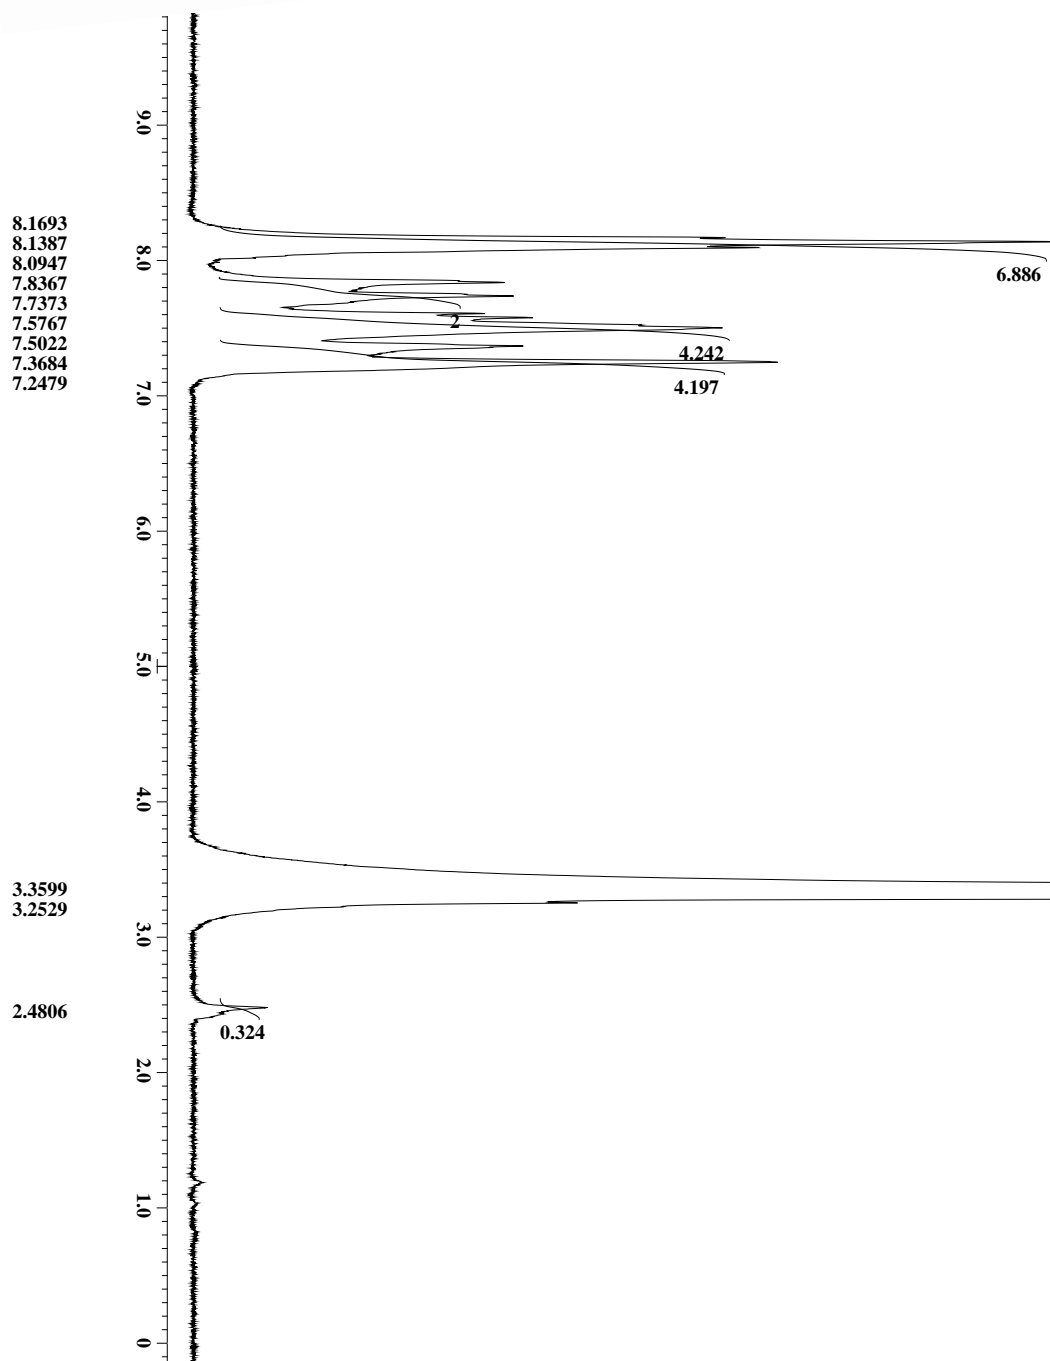

Supplement: s1 [file s1]
